# Supplementary material for: Intrinsic Cellular Susceptibility to Barrett’s Esophagus in Adults Born with Esophageal Atresia
Source: MDPI journal article supplement (doi:10.3390/cancers14030513), 2022-01-20
Supplement: s1 [file s1]

## Article

# Intrinsic Cellular Susceptibility to Barrett's Esophagus in Adults Born with Esophageal Atresia

Chantal A. ten Kate <sup>1,2,3</sup>, Annelies de Klein <sup>3</sup>, Bianca M. de Graaf <sup>3</sup>, Michail Doukas <sup>4</sup>, Antti Koivusalo <sup>5</sup>, Mikko P. Pakarinen <sup>5</sup>, Robert van der Helm <sup>3</sup>, Tom Brands <sup>3</sup>, Hanneke IJsselstijn <sup>1</sup>, Yolande van Bever <sup>3</sup>, René M.H. Wijnen <sup>1</sup>, Manon C.W. Spaander <sup>2</sup> and Erwin Brosens <sup>3,\*</sup>

## Supplementary Material Content

### *Supplementary Tables and Figures:*

Table S1: Genes and polymorphisms associated with Barrett's esophagus (BE), with selected proxy SNPs used for SNP array genotyping

Table S2: Genes and polymorphisms associated with Barrett's esophagus (BE), esophageal adenocarcinoma (EAC) or esophageal squamous cell carcinoma (ESCC)

Table S3: Odds ratios calculated from the single nucleotide polymorphism (SNP) genotyping data

Table S4: Overview of polygenic risk scores (PGRS) for all groups

Table S5: Overview of the selected odds ratios (OR) used for the polygenic risk score

Table S6: Comparison of all groups separately for the polygenic risk score (PGRS)

Table S7: Overview of survival rates of fibroblast cells after exposure to pH adjusted medium

Table S8: Basic characteristics of selected patients and controls for RNA sequencing of the esophageal biopsy specimen and for the SNP array genotyping

Table S9: Phenotype description

Table S10: Summarized results of reassessments of pathology slides of esophageal biopsy specimens

Table S11: Complete results of reassessments of pathology slides of esophageal biopsy specimens

Table S12: Results of RNA and DNA isolation

Table S13: Quality report of RNA sequencing data from esophageal biopsy specimens

Table S14: Results of RNA isolation from fibroblast of the acid exposure experiments

Table S15: Number of significantly differently expressed genes when comparing the different subgroups

Table S16: Canonical pathways, significantly enriched by differentially expressed genes, and corresponding diseases and bio functions

Table S17: Canonical pathways, enriched by differentially expressed genes

Table S18: Canonical pathways, significantly enriched by differentially expressed genes

Figure S1: Overview of survival rates of fibroblast cells after exposure to pH adjusted medium.

Figure S2: Examples of the review-based checklist used for the histopathological assessments

Figure S3: Two-dimensional scatter plot of principal component analysis (PCA)

Figure S4: Tree-dimensional scatter plot of principal component analysis (PCA)

Figure S5: Morphology (20x magnification) of fibroblast cells

Figure S6: Heat map of mean transcript per million (TPM) for fibroblast cells after the in vitro experiment

Figure S7: Number of differentially expressed genes between patients with EA and healthy controls

Figure S8: Violin plots of gastroesophageal (GEJ) samples and box plots of acid-exposed fibroblasts

Figure S9. SPINK1 is a potential BE biomarker

Datafile S1: Individual gene counts (Excel sheet)

*Supplementary Methods:*

SM1: Sample extraction protocol and storage

SM2: RNA and DNA isolation

SM3: SNP genotyping

SM4: RNA sequencing

SM5: Acid exposure experiments.

**Table S1.** Genes and polymorphisms associated with Barrett’s esophagus (BE), with selected proxy SNPs used for SNP array genotyping.

| Gene                    | SNP         | Position hg19   | Risk Allele | Associated with | OR (95% CI) ± SE (β)          | Type of Study | Number of Patients (n) | Number of Controls (n) | Ref  | Proxy SNP  | D'     | R'     |
|-------------------------|-------------|-----------------|-------------|-----------------|-------------------------------|---------------|------------------------|------------------------|------|------------|--------|--------|
| <i>ALDH1A2</i>          | rs3784262   | chr15:58253106  | C           | BE, EAC         | 0.90 (0.87-0.93)              | Meta-analysis | 10038                  | 27975                  | [55] | rs3204689  | 0.9677 | 0.9214 |
| <i>BARX1</i> *          | rs11789015  | chr9:96716028   | G           | BE              | 0.86 (0.81-0.92)              | Meta-analysis | 5027                   | 15289                  | [55] | rs11789015 | 1      | 1      |
|                         |             |                 |             |                 | 0.85 (0.79-0.91)              | GWAS          | 3175                   | 10117                  | [56] |            |        |        |
|                         |             |                 |             |                 |                               |               |                        |                        |      |            |        |        |
| <i>CCND1</i>            | rs9344      | chr11:69462910  | A           | BE              | 1.40 (0.76-2.56) <sup>A</sup> | Case-control  | 125                    | 95                     | [57] | rs9344     | 1      | 1      |
| <i>CDX1</i>             | rs717746    | chr5:149556558  | G           | BE              | 2.07 (1.05-4.08) <sup>B</sup> | Case-control  | 109                    | 223 <sup>E</sup>       | [58] | rs717746   | 1      | 1      |
| <i>CDX2</i>             | rs4769585   | chr13:28550578  | C           | BE              | 2.68 (1.20-5.98) <sup>C</sup> | Case-control  | 109                    | 223 <sup>E</sup>       | [58] | rs6491244  | 0.9880 | 0.9722 |
| <i>CRTC1</i>            | rs10423674  | chr19:18817903  | T           | BE              | 0.89 (0.95-0.93)              | Meta-analysis | 6605                   | 23888                  | [55] | rs10423674 | 1      | 1      |
|                         |             |                 |             |                 | 0.85 (0.80-0.91)              | GWAS          | 3175                   | 10117                  | [56] |            |        |        |
|                         |             |                 |             |                 |                               |               |                        |                        |      |            |        |        |
| <i>FOXF1</i> *          | rs9936833   | chr16:86403118  | C           | BE              | 1.14 (1.10-1.19)              | GWAS          | 7838                   | 17997                  | [59] | rs9936833  | 1      | 1      |
|                         |             |                 |             |                 | 1.13 (0.98-1.29)              | Case-control  | 1065                   | 1019                   | [60] |            |        |        |
|                         |             |                 |             |                 |                               |               |                        |                        |      |            |        |        |
| <i>FOXP1</i> *          | rs2687201   | chr3:70928930   | A           | BE              | 1.16 (1.10-1.23)              | Meta-analysis | 5027                   | 15289                  | [55] | rs287201   | 1      | 1      |
|                         |             |                 |             |                 | 1.18 (1.10-1.26)              | GWAS          | 3175                   | 10117                  | [56] |            |        |        |
|                         |             |                 |             |                 |                               |               |                        |                        |      |            |        |        |
| <i>GDF7</i> *           | rs3072      | chr2:20878406   | G           | BE              | 1.14 (1.09-1.18)              | GWAS          | 10158                  | 21062                  | [55] | rs9306894  | 0.9914 | 0.9662 |
| <i>GSTP1</i>            | rs1695      | chr11: 67352689 | G           | BE              | 2.56 (1.30-5.05)              | Case-control  | 22                     | 173                    | [61] | rs1695     | 1      | 1      |
|                         |             |                 |             |                 | 1.50 (1.16-1.95)              | Meta-analysis | 434                    | 738                    | [62] |            |        |        |
| <i>IGF1</i>             | rs6214      | chr12:102793569 | A           | BE              | 0.90 (0.59-1.37) <sup>D</sup> | Case-control  | 207                    | 244                    | [63] | rs6214     | 1      | 1      |
| <i>IL12B</i>            | rs3212227   | c:158742950     | C           | BE              | 1.82 (1.17-2.69)              | Case-control  | 255                    | 247 <sup>F</sup>       | [64] | rs3213094  | 1      | 1      |
| <i>KHDRBS2-MTRNR2L9</i> | rs62423175  | chr6:62195368   | A           | BE              | 1.14 ± 0.03                   | Meta-analysis | 6167                   | 17159                  | [65] | rs1516709  | 0.9149 | 0.6837 |
| <i>LINC00208-BLK</i>    | rs10108511  | chr8:11435516   | T           | BE              | 1.14 ± 0.02                   | Meta-analysis | 6167                   | 17159                  | [65] | rs2898290  | 0.9959 | 0.9565 |
| <i>MGST1</i>            | rs7312090   | chr12:16515945  | T           | BE              | 1.16 (1.07-1.25)              | Case-control  | 3288                   | 3203                   | [66] | rs6488840  | 1      | 0.9928 |
|                         | rs4149186   | chr12:16498700  | C           | BE              | 1.11 (1.02-1.21)              | Case-control  | 3288                   | 3203                   | [66] | rs7312090  | 1      | 1      |
| <i>MHC region</i>       | rs9257809   | chr6:29356331   | A           | BE              | 1.12 (1.13-1.28)              | GWAS          | 7838                   | 17997                  | [59] | rs9257809  | 1      | 1      |
|                         |             |                 |             | BE              | 1.26 ± 0.04                   | Meta-analysis | 6167                   | 17159                  | [11] |            |        |        |
| <i>MSRA</i>             | rs17749155  | chr8:10068073   | A           | BE              | 1.20 ± 0.03                   | Meta-analysis | 6167                   | 17159                  | [11] | rs7832976  | 0.9829 | 0.9045 |
| <i>SATB2</i>            | rs139606545 | chr2:200045039  | T           | BE              | 0.91 ± 0.02                   | Meta-analysis | 6167                   | 17159                  | [11] | rs4675343  | 0.9958 | 0.9188 |
| <i>TBX5</i> *           | rs2701108   | chr12:114674261 | C           | BE              | 0.90 (0.86-0.93)              | GWAS          | 10158                  | 21062                  | [55] | rs2701108  | 1      | 1      |
| <i>TMOD1</i>            | rs7852462   | chr9:100310501  | T           | BE              | 0.87 ± 0.02                   | Meta-analysis | 6167                   | 17159                  | [11] | rs10759765 | 0.9225 | 0.824  |

OR = odds ratio, CI = confidence interval, SE = standardized error. \* = Genes involved in foregut development. All odds ratios (OR) are presented for heterozygote risk alleles. <sup>A</sup> Homozygote A/A: OR 3.69 (1.46–9.29), <sup>B</sup> Homozygote G/G: OR 3.65 (1.73–7.69), <sup>C</sup> Homozygote C/C: OR 2.56 (1.10–

5.94), <sup>D</sup> Homozygote A/A: OR 0.43 (0.24–0.75). <sup>E</sup> Controls were patients with gastroesophageal reflux disease, defined as either endoscopic erosive esophagitis or complaints of substernal chest burning and/or regurgitation. <sup>F</sup> Controls were patients with reflux esophagitis.

**Table S2.** Genes and polymorphisms associated with Barrett’s esophagus (BE), esophageal adenocarcinoma (EAC) or esophageal squamous cell carcinoma (ESCC).

| Gene                     | SNP         | Position hg19   | Risk Allele | Associated with  | OR (95% CI) ± SE (β) | Type of Study | Number of Patients (n) | Number of Controls (n) | Ref  |
|--------------------------|-------------|-----------------|-------------|------------------|----------------------|---------------|------------------------|------------------------|------|
| <i>ABCC5-HTR3c</i>       | rs9823696   | chr3:183783353  | A           | EAC              | 1.17 (1.11-1.24)     | Meta-analysis | 4112                   | 17159                  | [11] |
| <i>BARX1</i> *           | rs11789015  | chr9:96716028   | G           | BE, EAC          | 0.85 (0.81-0.89)     | Meta-analysis | 4242                   | 15292                  | [55] |
|                          |             |                 |             | EAC              | 0.81 (0.75-0.88)     | GWAS          | 2390                   | 10120                  | [56] |
|                          |             |                 |             | EAC              | 0.87 (0.75-1.02)     | Case-control  | 1065                   | 1019                   | [60] |
|                          |             |                 |             | ESCC             | 0.77 (0.65-0.90)     | Case-control  | 2119                   | 2463                   | [66] |
| <i>CAMTA1</i>            | rs17030152  | chr1:7083719    | C           | EAC              | 0.87 (0.75-1.02)     | Case-control  | 1065                   | 1019                   | [60] |
| <i>CCND1</i>             | rs9344      | chr11:69462910  | A           | EAC <sup>A</sup> | 1.37 (0.57-3.26)     | Case-control  | 56                     | 95                     | [57] |
| <i>CDX1</i>              | rs3776083   | chr5:149567970  | A           | BE               | 1.47 (0.61-3.54)     | Case-control  | 109                    | 223 <sup>B</sup>       | [58] |
| <i>CDX2</i>              | rs3812863   | chr13:28545268  | A           | BE               | 1.95 (0.89-4.24)     | Case-control  | 109                    | 223 <sup>B</sup>       | [58] |
| <i>CHEK2</i>             | rs738722    | chr22:28130012  | T           | ESCC             | 1.30 (1.19-1.43)     | GWAS          | 2115                   | 3202                   | [67] |
| <i>CFTR</i>              | rs17451754  | chr7:117256712  | A           | BE               | 0.87 ± 0.03          | Meta-analysis | 6167                   | 17159                  | [11] |
|                          |             |                 |             | EAC              | 0.80 ± 0.04          | Meta-analysis | 4112                   | 17159                  | [11] |
| <i>CRTC1</i>             | rs10419226  | chr19:18803172  | A           | BE               | 1.19 (1.12-1.26)     | GWAS          | 3175                   | 10117                  | [56] |
|                          | rs199620551 | chr19:18804295  | T           | BE               | 0.90 ± 0.02          | Meta-analysis | 6167                   | 17159                  | [11] |
|                          |             |                 |             | EAC              | 0.90 ±0.03           | Meta-analysis | 4112                   | 17159                  | [11] |
|                          |             |                 |             | EAC              | 0.85 (0.79-0.91)     | GWAS          | 2390                   | 10120                  | [56] |
| <i>DIO3</i>              | rs2895917   | chr14:102052775 | T           | EAC              | 0.88 (0.76-1.02)     | Case-control  | 1065                   | 1019                   | [60] |
| <i>FOXF1</i>             | rs2178146   | chr16:86463695  | G           | BE               | 0.89 (0.84-0.95)     | GWAS          | 3175                   | 10117                  | [56] |
|                          | rs3111601   | chr16:86400081  | G           | BE               | 1.13 (1.05-1.20)     | GWAS          | 3175                   | 10117                  | [56] |
|                          |             |                 |             | EAC              | 1.16 (1.08-1.24)     | GWAS          | 2390                   | 10120                  | [56] |
|                          | rs2178146   | chr16:86463695  | G           | EAC              | 0.85 (0.79-0.91)     | GWAS          | 2390                   | 10120                  | [56] |
|                          | rs9936833   | chr16:86403118  | C           | EAC              | 1.21 (0.99-1.47)     | Case-control  | 318                    | 605                    | [68] |
| <i>FOXF1-LOC732275</i> * | rs1979654   | chr3:86396835   | C           | BE               | 0.90 ± 0.02          | Meta-analysis | 6167                   | 17159                  | [11] |
|                          |             |                 |             | EAC              | 0.90 ± 0.03          | Meta-analysis | 4112                   | 17159                  | [11] |
| <i>FOXP1</i> *           | rs2687202   | chr3:70929983   | T           | BE               | 1.13 ± 0.02          | Meta-analysis | 6167                   | 17159                  | [11] |
|                          |             |                 |             | EAC              | 1.13 ± 0.03          | Meta-analysis | 4112                   | 17159                  | [11] |
|                          | rs9837992   | chr3:70959438   | A           | EAC              | 1.23 (1.07-1.42)     | Case-control  | 1065                   | 1019                   | [60] |
| <i>FOXP1</i> *           | rs2687201   | chr3:70928930   | A           | BE, EAC          | 1.17 (1.11-1.23)     | Meta-analysis | 4242                   | 15292                  | [55] |

|                            |             |                 |   |      |                  |               |          |          |      |
|----------------------------|-------------|-----------------|---|------|------------------|---------------|----------|----------|------|
|                            |             |                 |   | EAC  | 1.20 (1.12-1.29) | GWAS          | 2390     | 10120    | [56] |
|                            |             |                 |   | EAC  | 1.26 (1.09-1.46) | Case-control  | 1065     | 1019     | [60] |
| <i>GATA6</i>               | rs4800353   | chr18:19654137  | G | EAC  | 0.83 (0.69-1.01) | Case-control  | 1065     | 1019     | [60] |
| <i>GDF7-LDAH*</i>          | rs7255      | chr2:20878820   | C | BE   | 1.12 ± 0.02      | Meta-analysis | 6167     | 17159    | [11] |
|                            |             |                 |   | EAC  | 1.17 ± 0.03      | Meta-analysis | 4112     | 17159    | [11] |
| <i>GHR</i>                 | rs6898743   | chr5:42602492   | G | EAC  | 0.42 (0.23-0.76) | Case-control  | 210      | 240      | [63] |
| <i>GSTP1</i>               | rs1695      | chr11: 67352689 | G | EAC  | 1.73 (0.75-4.02) | Case-control  | 12       | 21       | [69] |
|                            |             |                 |   | EAC  | 1.20 (0.94-1.54) | Meta-analysis | 432      | 1086     | [62] |
| <i>KHDRBS2-MTRNR2L9</i>    | rs62423175  | chr6:62195368   | A | EAC  | 1.23 ± 0.0377    | Meta-analysis | 4112     | 17159    | [11] |
| <i>LINC00208-BLK</i>       | rs10108511  | chr8:11435516   | T | EAC  | 1.08 ± 0.03      | Meta-analysis | 4112     | 17159    | [11] |
| <i>MFHAS1</i>              | rs4523255   | chr8:8713038    | T | EAC  | 1.14 (0.99-1.31) | Case-control  | n = 1065 | n = 1019 | [60] |
| <i>MGST1</i>               | rs4149203   | chr12:16514921  | T | BE   | 1.16 (1.08-1.26) | Case-control  | n = 3295 | n = 3207 | [65] |
|                            | rs3852575   | chr12:16516260  | T | BE   | 1.16 (1.08-1.25) | Case-control  | n = 3295 | n = 3207 | [65] |
|                            | rs1419204   | chr12:16515062  | C | BE   | 1.16 (1.08-1.25) | Case-control  | n = 3295 | n = 3207 | [65] |
|                            | rs4149207   | chr12:16517491  | T | BE   | 1.14 (1.06-1.23) | Case-control  | n = 3295 | n = 3207 | [65] |
|                            | rs4149208   | chr12:16517581  | T | BE   | 1.14 (1.06-1.23) | Case-control  | n = 3295 | n = 3207 | [65] |
|                            | rs3759207   | chr12:16516710  | C | BE   | 1.14 (1.05-1.23) | Case-control  | n = 3295 | n = 3207 | [65] |
|                            | rs4149195   | chr12:16512128  | G | BE   | 1.20 (1.07-1.35) | Case-control  | n = 3295 | n = 3207 | [65] |
|                            | rs2239676   | chr12:16500448  | G | BE   | 1.19 (1.06-1.34) | Case-control  | n = 3295 | n = 3207 | [65] |
|                            | rs4149187   | chr12:16500071  | G | BE   | 1.18 (1.05-1.32) | Case-control  | n = 3295 | n = 3207 | [65] |
|                            | rs2239677   | chr12:16500680  | A | BE   | 1.38 (1.09-1.75) | Case-control  | n = 3295 | n = 3207 | [65] |
|                            | rs2239675   | chr12:16500265  | G | BE   | 1.12 (1.02-1.23) | Case-control  | n = 3295 | n = 3207 | [65] |
|                            | rs2975138   | chr12:16501551  | A | BE   | 1.10 (1.02-1.20) | Case-control  | n = 3295 | n = 3207 | [65] |
| <i>MHC region</i>          | rs9257809   | chr6:29356331   | G | EAC  | 1.14 ± 0.05      | Meta-analysis | 4112     | 17159    | [11] |
|                            |             |                 |   | ESCC | 1.76 (1.16-2.66) | Case-control  | n = 107  | n = 605  | [68] |
| <i>MSRA</i>                | rs17749155  | chr8:10068073   | A | EAC  | 1.13 ± 0.04      | Meta-analysis | 4112     | 17159    | [11] |
| <i>PCDH20</i>              | rs2669333   | chr13:63574196  | A | EAC  | 1.15 (1.00-1.33) | Case-control  | n = 1065 | n = 1019 | [60] |
| <i>PLCE1</i>               | rs2274223   | chr10:96066314  | G | ESCC | 1.34 (1.22-1.48) | GWAS          | N = 2115 | n = 3202 | [67] |
|                            | rs3765524   | chr10:96058298  | T | ESCC | 1.35 (1.22-1.49) | GWAS          | N = 2115 | n = 3202 | [67] |
|                            | rs3781264   | chr10:96070375  | C | ESCC | 1.38 (1.23-1.53) | GWAS          | N = 2115 | n = 3202 | [67] |
|                            | rs11187842  | chr10:96052511  | T | ESCC | 1.37 (1.23-1.53) | GWAS          | N = 2115 | n = 3202 | [67] |
|                            | rs753724    | chr10:96051417  | T | ESCC | 1.38 (1.23-1.54) | GWAS          | N = 2115 | n = 3202 | [67] |
|                            |             |                 |   |      |                  |               |          |          |      |
| <i>SATB2</i>               | rs139606545 | chr2:200045039  | T | EAC  | 0.88 ± 0.03      | Meta-analysis | 4112     | 17159    | [11] |
| <i>TBX5-LOC105369996 *</i> | rs1247942   | chr12:114673723 | C | BE   | 0.88 ± 0.02      | Meta-analysis | 6167     | 17159    | [11] |
|                            |             |                 |   | EAC  | 0.90 ± 0.03      | Meta-analysis | 4112     | 17159    | [11] |

|                   |            |                |   |     |                  |               |          |          |      |
|-------------------|------------|----------------|---|-----|------------------|---------------|----------|----------|------|
| <i>TMOD1</i>      | rs7852462  | chr9:100310501 | T | EAC | 0.93 ± 0.03      | Meta-analysis | 4112     | 17159    | [11] |
| <i>TPPP-CEP72</i> | rs9918259  | chr5:663092    | T | BE  | 1.20 ± 0.04      | Meta-analysis | 6167     | 17159    | [11] |
|                   |            |                |   | EAC | 1.20 ± 0.04      | Meta-analysis | 4112     | 17159    | [11] |
| <i>XRCC2</i>      | rs11771429 | chr7:153271877 | T | EAC | 0.85 (0.71-1.02) | Case-control  | n = 1065 | n = 1019 | [60] |

These polymorphisms were not selected for SNP array genotyping because no proxy SNP could be selected, or because they were only associated with EAC or ESCC and not with BE. OR = odds ratio, CI = confidence interval, SE = standardized error. \* = Genes involved in foregut development. All odds ratios (OR) are presented for heterozygote risk alleles. <sup>A</sup> Homozygote A/A: OR 5.99 (1.86–18.96). <sup>B</sup> Controls were patients with gastroesophageal reflux disease, defined as either endoscopic erosive esophagitis or complaints of substernal chest burning and/or regurgitation.

**Table S3.** Odds ratios calculated from the single nucleotide polymorphism (SNP) genotyping data.

| Gene                    | SNP         | Group A (EA/BE) vs. Controls |                        | Group B (EA only) vs. Controls |                        | Group C (BE only) vs. Controls |                        | Group A (EA/BE) vs. Group C (BE only) |                        |
|-------------------------|-------------|------------------------------|------------------------|--------------------------------|------------------------|--------------------------------|------------------------|---------------------------------------|------------------------|
|                         |             | OR (95% CI)                  | p-Value X <sup>2</sup> | OR (95% CI)                    | p-Value X <sup>2</sup> | OR (95% CI)                    | p-Value X <sup>2</sup> | OR (95% CI)                           | p-Value X <sup>2</sup> |
| <i>ALDH1A2</i>          | rs3784262   | 2.28 (1.08-4.83)             | <b>0.028 *</b>         | 0.53 (0.22-0.83)               | <b>0.005 *</b>         | 0.58 (0.24-1.40)               | 0.222                  | 3.94 (1.24-12.4)                      | <b>0.017 *</b>         |
| <i>BARX1</i>            | rs11789015  | 1.70 (0.87-3.31)             | 0.116                  | 1.43 (0.91-2.26)               | 0.124                  | 0.97 (0.35-2.68)               | 0.956                  | 1.75 (0.53-5.82)                      | 0.361                  |
| <i>CCND1</i>            | rs9344      | 1.04 (0.54-1.97)             | 0.916                  | 0.80 (0.52-1.23)               | 0.306                  | 1.41 (0.58-3.40)               | 0.450                  | 0.74 (0.25-2.17)                      | 0.581                  |
| <i>CDX1</i>             | rs717746    | 1.14 (0.60-2.16)             | 0.695                  | 1.72 (1.11-2.67)               | <b>0.014 *</b>         | 0.61 (0.24-1.54)               | 0.294                  | 1.86 (0.61-5.65)                      | 0.275                  |
| <i>CDX2</i>             | rs4769585   | 1.28 (0.66-2.46)             | 0.463                  | 1.05 (0.68-1.61)               | 0.832                  | 0.45 (0.18-1.13)               | 0.082                  | 2.85 (0.93-8.73)                      | 0.064                  |
| <i>CRTC1</i>            | rs10423674  | 1.14 (0.59-2.22)             | 0.693                  | 0.58 (0.35-0.96)               | <b>0.033 *</b>         | 1.06 (0.42-2.65)               | 0.908                  | 1.08 (0.35-3.34)                      | 0.890                  |
| <i>FOXF1</i>            | rs9936833   | 0.56 (0.27-1.16)             | 0.116                  | 0.81 (0.52-1.28)               | 0.368                  | 0.52 (0.19-1.44)               | 0.205                  | 1.07 (0.31-3.69)                      | 0.913                  |
| <i>FOXP1</i>            | rs2687201   | 1.41 (0.73-2.72)             | 0.306                  | 0.86 (0.53-1.38)               | 0.526                  | 4.01 (1.60-10.07)              | <b>0.002 *</b>         | 0.35 (0.11-1.08)                      | 0.064                  |
| <i>GDF7</i>             | rs3072      | 0.45 (0.21-0.99)             | 0.044                  | 0.93 (0.59-1.45)               | 0.740                  | 2.08 (0.86-5.03)               | 0.098                  | 0.22 (0.07-0.70)                      | <b>0.009 *</b>         |
| <i>GSTP1</i>            | rs1695      | 1.57 (0.82-2.99)             | 0.170                  | 0.81 (0.51-1.30)               | 0.387                  | 0.83 (0.32-2.16)               | 0.705                  | 1.89 (0.60-5.93)                      | 0.276                  |
| <i>IGF1</i>             | rs6214      | 0.48 (0.23-0.98)             | <b>0.041 *</b>         | 0.76 (0.49-1.18)               | 0.225                  | 0.80 (0.35-1.83)               | 0.593                  | 0.60 (0.20-1.77)                      | 0.352                  |
| <i>ILI12B</i>           | rs3212227   | 1.21 (0.57-2.56)             | 0.629                  | 0.67 (0.37-1.23)               | 0.195                  | 1.29 (0.47-3.57)               | 0.619                  | 0.93 (0.27-3.26)                      | 0.911                  |
| <i>KHDRBS2-MTRNR2L9</i> | rs62423175  | 1.40 (0.69-2.84)             | 0.352                  | 0.76 (0.44-1.33)               | 0.341                  | 1.14 (0.42-3.16)               | 0.793                  | 1.22 (0.36-4.16)                      | 0.749                  |
| <i>LINC00208-BLK</i>    | rs10108511  | 1.31 (0.69-2.49)             | 0.415                  | 1.06 (0.69-1.63)               | 0.793                  | 1.06 (0.44-2.55)               | 0.898                  | 1.24 (0.42-3.64)                      | 0.703                  |
| <i>MGST1</i>            | rs4149186   | 1.51 (0.76-3.02)             | 0.238                  | 1.30 (0.81-2.10)               | 0.279                  | 1.09 (0.40-3.02)               | 0.863                  | 1.38 (0.41-4.66)                      | 0.601                  |
| <i>MGST1</i>            | rs7312090   | 0.57 (0.26-1.25)             | 0.158                  | 1.00 (0.63-1.58)               | 0.995                  | 0.54 (0.18-1.60)               | 0.258                  | 1.07 (0.28-4.07)                      | 0.925                  |
| <i>MHC region</i>       | rs9257809   | 0.67 (0.26-1.73)             | 0.404                  | 0.89 (0.44-1.80)               | 0.741                  | 0.91 (0.21-3.93)               | 0.890                  | 0.73 (0.13-4.13)                      | 0.726                  |
| <i>MSRA</i>             | rs17749155  | 0.51 (0.18-1.43)             | 0.194                  | 0.82 (0.46-1.46)               | 0.494                  | 0.11 (0.36-3.23)               | 0.895                  | 0.47 (0.11-2.11)                      | 0.320                  |
| <i>SATB2</i>            | rs139606545 | 0.73 (0.37-1.41)             | 0.347                  | 0.75 (0.48-1.16)               | 0.198                  | 0.42 (0.15-1.14)               | 0.081                  | 1.75 (0.53-5.82)                      | 0.361                  |
| <i>TBX5</i>             | rs2701108   | 1.45 (0.76-2.79)             | 0.260                  | 1.45 (0.94-2.24)               | 0.094                  | 0.67 (0.24-1.83)               | 0.431                  | 2.18 (0.66-7.20)                      | 0.198                  |
| <i>TMOD1</i>            | rs7852462   | 0.96 (0.50-1.83)             | 0.898                  | 0.96 (0.62-1.47)               | 0.839                  | 1.08 (0.45-2.61)               | 0.868                  | 0.89 (0.30-2.63)                      | 0.832                  |

Group A = patients with esophageal atresia (EA) and Barrett's esophagus (BE) ( $n = 19$ ); Group B = patients with EA without BE ( $n = 44$ ); Group C = patients with BE without EA in history ( $n = 10$ ); controls  $n = 730$ . OR = odds ratio, CI = confidence interval,  $\chi^2$  = chi-square test. Asterisk indicates significance level  $p < 0.05$ .

**Table S4.** Overview of polygenic risk scores (PGRS) for all groups, based on odds ratios (ORs) selected from the literature (left) and ORs calculated from the SNP array (right).

| Group             | n   | PGRS Based on ORs from Literature |      | PGRS Based on ORs Calculated from Our Study Population |                    |      |                     |
|-------------------|-----|-----------------------------------|------|--------------------------------------------------------|--------------------|------|---------------------|
|                   |     | Median (range)                    | IQR  | Kruskal-Wallis Test                                    | Median (range)     | IQR  | Kruskal-Wallis Test |
| Group A (EA/BE)   | 19  | 3.24 (1.39–4.68)                  | 1.40 | 0.495                                                  | 3.05 (0.14–6.04)   | 1.70 | <b>0.001 *</b>      |
| Group B (EA only) | 44  | 2.98 (1.19–4.74)                  | 1.28 |                                                        | 2.52 (−2.73–5.72)  | 3.38 |                     |
| Group C (BE only) | 10  | 2.63 (1.85–3.53)                  | 1.17 |                                                        | −0.24 (−2.83–2.15) | 2.42 |                     |
| Controls          | 730 | 3.00 (−0.28–5.78)                 | 1.65 |                                                        | 2.21 (−4.44–7.83)  | 2.21 |                     |

Group A = patients with esophageal atresia (EA) and Barrett's esophagus (BE); group B = patients with EA without BE; and group C = patients with BE without EA in history. IQR = interquartile range. Asterisk indicates significance level  $p < 0.05$ .

**Table S5.** Overview of the selected odds ratios (OR) used for the polygenic risk score.

| Gene             | SNP         | Proxy SNP  | Literature                       | SNP array Data (n = 29) |
|------------------|-------------|------------|----------------------------------|-------------------------|
|                  |             |            | OR (95% CI) $\pm$ SE ( $\beta$ ) | OR (95% CI)             |
| ALDH1A2          | rs3784262   | rs3204689  | 0.90 (0.87–0.93) [55]            | 3.94 (1.24–12.4)        |
| BARX1            | rs11789015  | rs11789015 | 0.86 (0.81–0.92) [55]            | 1.75 (0.53–5.82)        |
| CCND1            | rs9344      | rs9344     | 1.40 (0.76–2.56) [57]            | 0.74 (0.25–2.17)        |
| CDX1             | rs717746    | rs717746   | 2.07 (1.05–4.08) [58]            | 1.86 (0.61–5.65)        |
| CDX2             | rs4769585   | rs6491244  | 2.68 (1.20–5.98) [58]            | 2.85 (0.93–8.73)        |
| CRTC1            | rs10423674  | rs10423674 | 0.89 (0.95–0.93) [55]            | 1.08 (0.35–3.34)        |
| FOXF1            | rs9936833   | rs9936833  | 1.14 (1.10–1.19) [59]            | 1.07 (0.31–3.69)        |
| FOXP1            | rs2687201   | rs2687201  | 1.16 (1.10–1.23) [55]            | 0.35 (0.11–1.08)        |
| GDF7             | rs3072      | rs9306894  | 1.14 (1.09–1.18) [55]            | 0.22 (0.07–0.70)        |
| GSTP1            | rs1695      | rs1695     | 1.50 (1.16–1.95) [62]            | 1.89 (0.60–5.93)        |
| IGF1             | rs6214      | rs6214     | 0.90 (0.59–1.37) [63]            | 0.60 (0.20–1.77)        |
| IL12B            | rs3212227   | rs3213094  | 1.82 (1.17–2.69) [64]            | 0.93 (0.27–3.26)        |
| KHDRBS2-MTRNR2L9 | rs62423175  | rs1516709  | 1.14 $\pm$ 0.03 [11]             | 1.22 (0.36–4.16)        |
| LINC00208-BLK    | rs10108511  | rs2898290  | 1.14 $\pm$ 0.02 [11]             | 1.24 (0.42–3.64)        |
| MGST1            | rs4149186   | rs6488840  | 1.11 (1.02–1.21) [65]            | 1.38 (0.41–4.66)        |
| MGST1            | rs7312090   | rs7312090  | 1.16 (1.07–1.25) [65]            | 1.07 (0.28–4.07)        |
| MHC region       | rs9257809   | rs9257809  | 1.26 $\pm$ 0.04 [11]             | 0.73 (0.13–4.13)        |
| MSRA             | rs17749155  | rs7832976  | 1.20 $\pm$ 0.03 [11]             | 0.47 (0.11–2.11)        |
| SATB2            | rs139606545 | rs4675343  | 0.91 $\pm$ 0.02 [11]             | 1.75 (0.53–5.82)        |
| TBX5             | rs2701108   | rs2701108  | 0.90 (0.86–0.93) [65]            | 2.18 (0.66–7.20)        |
| TMOD1            | rs7852462   | rs10759765 | 0.87 $\pm$ 0.02 [11]             | 0.89 (0.30–2.63)        |

In case multiple studies published an OR for a certain SNP, the study with the largest sample size was included in the PGRS. For *MGST1* two SNPs were described, not in linkage disequilibrium with each other, for which both SNPs were included. OR = odds ratio, CI = confidence interval, SE = standardized error.

**Table S6.** Comparison of all groups separately for the polygenic risk score (PGRS) based on odds ratios (ORs) selected from the literature (left) and ORs calculated from the SNP array (right), using Mann-Whitney tests.



| Group                                   | PGRS based on ORs from literature | PGRS based on ORs calculated from our study population |
|-----------------------------------------|-----------------------------------|--------------------------------------------------------|
|                                         | <i>p-value</i>                    | <i>p-value</i>                                         |
| Group A (EA/BE) vs. Group B (EA only)   | 0.500                             | 0.274                                                  |
| Group A (EA/BE) vs. Group C (BE only)   | 0.069                             | <0.001 *                                               |
| Group A (EA/BE) vs. Controls            | 0.381                             | 0.055                                                  |
| Group B (EA only) vs. Group C (BE only) | 0.124                             | 0.001 *                                                |
| Group B (EA only) vs. Controls          | 0.694                             | 0.568                                                  |
| Group C (BE only) vs. Controls          | 0.251                             | <0.001 *                                               |

Group A = patients with esophageal atresia (EA) and Barrett's esophagus (BE) ( $n = 19$ ); Group B = patients with EA without BE ( $n = 44$ ); Group C = patients with BE without EA in history ( $n = 10$ ); controls  $n = 730$ .

**Table S7.** Overview of survival rates of fibroblast cells after exposure to pH adjusted medium.

| Experiment A    |              | Experiment B            |              |          |
|-----------------|--------------|-------------------------|--------------|----------|
| Exposure * (pH) | Survival (%) | Exposure (pH – minutes) | Survival (%) |          |
|                 | Controls     |                         | Patients     | Controls |
| 1.46            | 43.9         | 1.47 – 30               | 48.8         | 53.8     |
| 1.99            | 50.9         | 1.47 – 60               | 52.3         | 51.5     |
| 2.38            | 49.7         | 1.47 – 120              | 55.1         | 55.2     |
| 3.31            | 56.7         | 3.46 – 30               | 50.4         | 54.5     |
| 3.49            | 62.0         | 3.46 – 30               | 50.7         | 51.6     |
|                 |              | 3.46 – 30               | 50.0         | 48.7     |
|                 |              | 7.70 – 30               | 80.0         | 76.7     |

\* = 30 minutes. Experiment A are the pooled results of a duplo experiment on three control cell lines. Experiment B are the pooled results of a duplo experiment on three patient cell lines and three control cell lines.

**Table S8.** Basic characteristics of selected patients and controls for RNA sequencing of the esophageal biopsy specimen (upper), and for the SNP array genotyping (under).

|                                             | Group A (EA/BE, n = 11) | Group B (EA only, n = 10) | <i>p-value</i> <sup>A</sup> |  | <i>p-value</i> <sup>B</sup> |         |
|---------------------------------------------|-------------------------|---------------------------|-----------------------------|--|-----------------------------|---------|
|                                             |                         |                           |                             |  |                             |         |
| <b>Male (%)</b>                             | 10 (90.9)               | 6 (60.0)                  | 0.114                       |  | 7 (70.0)                    | 0.221   |
| <b>Type of EA<sup>c</sup></b>               |                         |                           |                             |  |                             |         |
| Type A                                      | 1 (9.1)                 | 0                         | 0.563                       |  |                             |         |
| Type C                                      | 8 (72.7)                | 6 (60.0)                  | 0.525                       |  |                             |         |
| Type E                                      | 0                       | 1 (10.0)                  | 0.437                       |  |                             |         |
| Unknown                                     | 2 (18.2)                | 3 (30.0)                  | N/E                         |  |                             |         |
| <b>Staged repair</b>                        | 1 (9.1)                 | 0 (0%)                    | 0.242                       |  |                             |         |
| <b>Fundoplication surgery in history</b>    | 4 (36.4)                | 2 (20.0)                  | 0.274                       |  | 1 (10.0)                    | 0.162   |
| <b>Median age at time of biopsy (range)</b> | 39.3 (20.5–58.7)        | 29.4 (21.8–49.3)          | 0.099                       |  | 59.1 (45.2–66.7)            | 0.003 * |
| <b>Tobacco smoking</b>                      |                         |                           |                             |  |                             |         |
| No                                          | 5 (45.5)                | 7 (70.0)                  | 0.189                       |  | 6 (60.0)                    | 0.231   |
| Former smoker                               | 4 (36.4)                | 1 (10.0)                  | 0.162                       |  | 2 (20.0)                    | 0.307   |
| Yes, active smoker                          | 2 (18.2)                | 2 (20.0)                  | 0.414                       |  | 1 (10.0)                    | 0.434   |
| Missing                                     | 0                       | 0                         | N/E                         |  | 1 (10.0)                    | N/E     |

|                               |                        |                          |                          |                  |                |
|-------------------------------|------------------------|--------------------------|--------------------------|------------------|----------------|
| <b>Alcohol consumption</b>    |                        |                          |                          |                  |                |
| No alcohol                    | 2 (18.2)               | 2 (20.0)                 | 0.409                    | 1 (10.0)         | 0.485          |
| ≤7 units/week                 | 8 (72.7)               | 8 (80.0)                 | 0.383                    | 4 (40.0)         | 0.400          |
| ≥8 units/week                 | 1 (9.1)                | 0                        | 0.550                    | 1 (10.0)         | 0.485          |
| Missing                       | 0                      | 0                        | N/E                      | 4 (40.0)         | N/E            |
| <b>Endoscopic esophagitis</b> |                        |                          |                          |                  |                |
| <sup>d</sup>                  |                        |                          |                          |                  |                |
| No                            | 6 (54.5)               | 10 (100.0)               | <b>0.023 *</b>           | 9 (90.0)         | 0.085          |
| Grade A                       | 4 (36.4)               | 0                        | 0.055                    | 0                | 0.055          |
| Grade B                       | 1 (9.1)                | 0                        | 0.524                    | 1 (10.0)         | 0.524          |
| <b>Length of BE</b>           |                        |                          |                          |                  |                |
| Short segment, <3 cm          | 5 (45.5)               |                          |                          | 0                | <b>0.023 *</b> |
| Long segment, ≥3 cm           | 6 (54.5)               |                          |                          | 10 (100.0)       | <b>0.023 *</b> |
| <b>Dysplasia</b>              | 0                      |                          |                          | 0                |                |
|                               |                        |                          |                          |                  |                |
|                               | <b>Group A</b>         | <b>Group B</b>           | <b>Group C</b>           | <b>Controls</b>  |                |
|                               | <b>(EA/BE, n = 19)</b> | <b>(EA only, n = 44)</b> | <b>(BE only, n = 10)</b> | <b>(n = 730)</b> |                |
| <b>Male (%)</b>               | 14 (73.3)              | 26 (59.1)                | 7 (70.0)                 | 340 (46.6)       |                |
| <b>Type of EA</b>             |                        |                          |                          |                  |                |
| Type A                        | 1 (5.3)                | 2 (4.5)                  |                          |                  |                |
| Type C                        | 16 (84.2)              | 37 (84.1)                |                          |                  |                |
| Type D                        | 0                      | 1 (2.3)                  |                          |                  |                |
| Type E                        | 0                      | 1 (2.3)                  |                          |                  |                |
| Unknown                       | 2 (10.5)               | 3 (6.8)                  |                          |                  |                |
| <b>Length of BE</b>           |                        |                          |                          |                  |                |
| Short segment, <3 cm          | 9 (47.4)               |                          | 0                        |                  |                |
| Long segment, ≥3 cm           | 10 (52.6)              |                          | 10 (100.0)               |                  |                |

Data is presented as n (%) or median (range). Asterisk indicates significance ( $p < 0.05$ ). EA = esophageal atresia, BE = Barrett's esophagus, N/E = not evaluated. <sup>a</sup> Mann-Whitney test, group A versus group B. <sup>b</sup> Mann-Whitney test, group A versus group C. <sup>c</sup> According to the Gross classification [70]. <sup>d</sup> According to the Los Angeles criteria [71]. EA/BE patients were significantly younger than BE only patients (median age 39.3 versus 59.1 years,  $p = 0.003$ ). BE only patients had more often long segment BE (≥3 cm) compared with EA/BE patients ( $p = 0.023$ ).

**Table S9.** Phenotype description.

| Individual | Gender | EA type<br>A | Phenotype                                                                                                                    | Remarks                                         |
|------------|--------|--------------|------------------------------------------------------------------------------------------------------------------------------|-------------------------------------------------|
| BBO-007    | male   | C            | EA/TEF, inguinal hernia                                                                                                      | -                                               |
| BBO-021    | male   | C            | EA/TEF, congenital hiatal hernia                                                                                             | -                                               |
| BBO-027    | male   | C            | EA/TEF, IHPS, extra ribs, fusion of vertebrae, macrocephaly, bulbar dermoid cyst, auricular tags, short thick/broad neck     | Oculo-auriculo-vertebral spectrum, Klippel-Feil |
| BBO-038    | male   | C            | EA/TEF, anorectal malformation, ureteral duplication, aplasia left kidney, dysplasia right kidney, hypospadias, hip luxation | VACTERL                                         |
| BBO-053    | female | unknown      | EA/TEF                                                                                                                       | -                                               |
| BBO-058    | male   | C            | EA/TEF, abnormal thoracic and lumbal vertebrae, congenital scoliosis, undescended testicles, inguinal hernia                 | -                                               |
| BBO-060    | male   | C            | EA/TEF                                                                                                                       | -                                               |
| BBO-061    | male   | A            | EA, adduction pollex                                                                                                         | -                                               |
| BBO-063    | male   | C            | EA/TEF                                                                                                                       | -                                               |
| BBO-074    | male   | unknown      | EA/TEF <sup>#</sup>                                                                                                          | -                                               |

Group A (EA/BE)

|                   |           |        |         |                                                                                                                                                                         |                                |
|-------------------|-----------|--------|---------|-------------------------------------------------------------------------------------------------------------------------------------------------------------------------|--------------------------------|
|                   | BBO-080   | male   | C       | EA/TEF, atrial septal defect type II, perimembranous ventricular septal defect                                                                                          |                                |
|                   | BBO-065   | male   | C       | EA/TEF                                                                                                                                                                  | -                              |
|                   | BBO-066   | male   | E       | TEF, hemivertebrae, fusion of vertebrae, 13 costae, anorectal malformation                                                                                              | -                              |
|                   | BBO-070   | female | unknown | EA/TEF                                                                                                                                                                  | -                              |
|                   | BBO-072   | female | unknown | Patient records could not be retrieved from archives                                                                                                                    | -                              |
|                   | BBO-077   | male   | C       | EA/TEF                                                                                                                                                                  | -                              |
| Group B (EA only) | BBO-086   | male   | C       | EA/TEF, microcephaly, microdactylia                                                                                                                                     | Feingold syndrome              |
|                   | BBO-087   | male   | C       | EA/TEF, IHPS, mild left sided expansion of the pyelocaliceal system, breath holding spells                                                                              | -                              |
|                   | BBO-090   | female | C       | EA/TEF, anorectal malformation (vestibular anus), atrial septal defect type II, perimembranous ventricular septal defect, hypertelorism, protruding ears, sacral dimple | VACTERL, Townes Brocks (Sall1) |
|                   | BBO-092   | female | C       | EA/TEF, dysmaturity                                                                                                                                                     | -                              |
|                   | BBO-094   | male   | unknown | EA/TEF <sup>#</sup>                                                                                                                                                     | -                              |
| EA <sup>B</sup>   | Patient 1 | male   | C       | EA/TEF, anorectal malformation, double outlet ventricle right, aplasia right thumb, cleft palate                                                                        | VACTERL                        |
|                   | Patient 2 | female | C       | EA/TEF, anorectal malformation, duodenal atresia, aplasia sacrum, vertebral anomalies, aplasia right kidney, cleft of lip and palate,                                   | VACTERL                        |
|                   | Patient 3 | female | C       | EA/TEF, perimembranous ventricular septal defect                                                                                                                        | -                              |

EA = esophageal atresia, TEF = tracheoesophageal fistula, BE = Barrett's esophagus, IHPS = infantile pyloric stenosis, VACTERL = vertebral, anorectal, cardiac, tracheoesophageal, renal and limb malformations. <sup>A</sup> According to Gross classification [70] <sup>B</sup> Patients included in acid exposure experiments.

**Table S10.** Summarized results of reassessments of pathology slides of esophageal biopsy specimens that were included in the differential expression analysis.

|                                                     | Group A<br>(EA/BE, n = 11) | Group B<br>(EA only, n = 10) | Group C<br>(BE only, n = 10) |
|-----------------------------------------------------|----------------------------|------------------------------|------------------------------|
| <b>Type of mucosa</b>                               |                            |                              |                              |
| Squamous epithelium                                 | +                          | +                            | +                            |
| Multi-layered squamous epithelium (overlying)       | -                          | -                            | -                            |
| columnar epithelium                                 |                            |                              |                              |
| Columnar epithelium                                 | +                          | +/-                          | +                            |
| <b>Gland subtype</b>                                |                            |                              |                              |
| Corpus glands, cardia glands or mixed               | mixed                      | mixed <sup>A</sup>           | mixed                        |
| <b>Esophagitis / GERD</b>                           |                            |                              |                              |
| GERD present                                        | -                          | -                            | -                            |
| Nonspecific inflammatory cell infiltrate            | +                          | +                            | +                            |
| Neutrophil granulocytes                             | +                          | -                            | +                            |
| <b>Intestinal metaplasia</b>                        |                            |                              |                              |
| Amount of intestinal metaplasia (average per slide) | 20%                        | N/A                          | 50%                          |
| Goblet cells present                                | +                          | -                            | +                            |
| Paneth cells present                                | -                          | +/-                          | +/-                          |
| <b>Dysplasia</b>                                    |                            |                              |                              |
| Dysplasia present                                   | -                          | -                            | -                            |
| Crypt architecture distorted                        | -                          | -                            | -                            |
| Cytology distorted                                  | -                          | -                            | -                            |

Plus (+) indicates the presence of a criteria in the majority of the slides. Minus (-) indicates the absence of a criteria in all slides. Plus-minus (+/-) indicate the presence of a criteria in a few slides. EA = esophageal atresia, BE = Barrett's



|                                                                   |         |         |         |         |         |         |         |         |         |         |
|-------------------------------------------------------------------|---------|---------|---------|---------|---------|---------|---------|---------|---------|---------|
| Cytology distorted                                                | -       | -       | -       | -       | -       | -       | +       | +/-     | -       | -       |
| <b>Group C (BE only)</b>                                          |         |         |         |         |         |         |         |         |         |         |
|                                                                   | BBE-001 | BBE-017 | BBE-021 | BBE-023 | BBE-028 | BBE-043 | BBE-053 | BBE-079 | BBE-080 | BBE-098 |
| <b>Type of mucosa</b>                                             |         |         |         |         |         |         |         |         |         |         |
| Squamous epithelium                                               | +       | -       | +       | +       | +       | +       | +       | +       | +       | +       |
| Multi-layered squamous epithelium (overlying) columnar epithelium | -       | -       | -       | +       | -       | -       | -       | -       | -       | -       |
| Columnar epithelium                                               | +       | +       | +       | +       | +       | +       | +       | +       | +       | +       |
| <b>Gland subtype</b>                                              |         |         |         |         |         |         |         |         |         |         |
| Corpus glands, cardia glands or mixed                             | M       | C       | C       | M       | C       | C       | C       | M       | M       | M       |
| <b>Esophagitis / GERD</b>                                         |         |         |         |         |         |         |         |         |         |         |
| GERD present                                                      | -       | -       | -       | -       | -       | -       | -       | -       | -       | -       |
| Nonspecific inflammatory cell infiltrate                          | +       | +       | +       | +       | +       | ++      | +       | +       | +       | ++      |
| Neutrophil granulocytes                                           | -       | +       | -       | +       | +       | +       | -       | +       | -       | +       |
| <b>Intestinal metaplasia</b>                                      |         |         |         |         |         |         |         |         |         |         |
| Amount of intestinal metaplasia (%)                               | 60      | 40      | 65      | 50      | 15      | 60      | 70      | 30      | 45      | 70      |
| Goblet cells present                                              | +       | +       | +       | +       | +       | +       | +       | +       | +       | +       |
| Paneth cells present                                              | +       | -       | -       | +       | +       | +       | +       | -       | +       | -       |
| <b>Dysplasia</b>                                                  |         |         |         |         |         |         |         |         |         |         |
| Dysplasia present                                                 | -       | -       | -       | -       | -       | -       | -       | -       | -       | -       |
| Crypt architecture distorted                                      | -       | -       | -       | -       | -       | -       | -       | -       | -       | -       |
| Cytology distorted                                                | -       | -       | -       | -       | -       | -       | -       | -       | -       | -       |

Plus (+) indicates the presence of a criteria in the majority of the slides. Minus (-) indicates the absence of a criteria in all slides. Plus-minus (+/-) indicate the presence of a criteria in a few slides. \* Combined with pseudo-pancreatic metaplasia. EA = esophageal atresia, BE = Barrett's esophagus, GERD = gastroesophageal reflux disease, M = mixed glands, C = cardia glands, Co = corpus glands, N/A = not applicable.

**Table S12.** Results of RNA and DNA isolation from esophageal biopsy specimens, blood and skin fibroblasts in terms of quantity and quality.

| Patient | RNA           |            |                  |     | DNA              |                  | Experiments that Patient Was Included in   |
|---------|---------------|------------|------------------|-----|------------------|------------------|--------------------------------------------|
|         | SQ<br>(ng/ul) | GEJ<br>RIN | Fibro<br>(ng/ul) | RIN | Blood<br>(ng/ul) | Fibro<br>(ng/ul) |                                            |
| BBO-007 | 162           | 10         | 262              | 7.2 | 60.1             |                  | RNAseq of biopsy specimens, SNP genotyping |
| BBO-018 |               |            |                  |     | 57.3             |                  | SNP genotyping                             |
| BBO-021 |               | 27         | 8.4              |     | 55.5             |                  | RNAseq of biopsy specimens, SNP genotyping |
| BBO-027 |               | 86         | 8.9              |     | 56.1             |                  | RNAseq of biopsy specimens, SNP genotyping |
| BBO-038 | 23            | 9.8        | 346              | 8.2 | 58.6             |                  | RNAseq of biopsy specimens, SNP genotyping |
| BBO-053 | 86            | 9.7        | 341              | 9.1 | 60.1             |                  | RNAseq of biopsy specimens, SNP genotyping |
| BBO-058 | 80            | 10         | 924              | 9.2 | 72.5             |                  | RNAseq of biopsy specimens, SNP genotyping |
| BBO-060 | 556           | 9.8        | 699              | 9.1 | 57.0             |                  | RNAseq of biopsy specimens, SNP genotyping |
| BBO-061 |               | 341        | 9.5              |     | 62.9             |                  | RNAseq of biopsy specimens, SNP genotyping |
| BBO-063 | 131           | 10         | 839              | 9.0 | 61.4             |                  | RNAseq of biopsy specimens, SNP genotyping |

Group A  
(EA/BE)

|                      |         |     |     |      |     |       |                                            |
|----------------------|---------|-----|-----|------|-----|-------|--------------------------------------------|
| Group B<br>(EA only) | BBO-064 |     |     |      |     | 58.6  | SNP genotyping                             |
|                      | BBO-069 |     |     |      |     | 59.5  | SNP genotyping                             |
|                      | BBO-074 | 313 | 10  | 132  | 9.9 | 58.7  | RNAseq of biopsy specimens, SNP genotyping |
|                      | BBO-080 | 206 | 9.9 | 388  | 7.6 | 57.3  | RNAseq of biopsy specimens, SNP genotyping |
|                      | BBO-134 |     |     |      |     | 50.0  | SNP genotyping                             |
|                      | BBO-142 |     |     |      |     | 50.0  | SNP genotyping                             |
|                      | BBO-149 |     |     |      |     | 50.0  | SNP genotyping                             |
|                      | BBO-160 |     |     |      |     | 50.0  | SNP genotyping                             |
|                      | EAH1    |     |     |      |     | 158.3 | SNP genotyping                             |
|                      | EAH2    |     |     |      |     | 111.5 | SNP genotyping                             |
|                      | EAH3    |     |     |      |     | 107.2 | SNP genotyping                             |
|                      | EAH4    |     |     |      |     | 151.4 | SNP genotyping                             |
|                      | EAH5    |     |     |      |     | 101.5 | SNP genotyping                             |
|                      | EAH6    |     |     |      |     | 86.0  | SNP genotyping                             |
|                      | EAH7    |     |     |      |     | 246.0 | SNP genotyping                             |
|                      | BBO-002 |     |     |      |     | 66.9  | SNP genotyping                             |
|                      | BBO-003 |     |     |      |     | 59.9  | SNP genotyping                             |
|                      | BBO-013 |     |     |      |     | 55.7  | SNP genotyping                             |
|                      | BBO-014 |     |     |      |     | 56.2  | SNP genotyping                             |
|                      | BBO-015 |     |     |      |     | 53.8  | SNP genotyping                             |
|                      | BBO-020 |     |     |      |     | 56.3  | SNP genotyping                             |
|                      | BBO-026 |     |     |      |     | 64.9  | SNP genotyping                             |
|                      | BBO-034 |     |     |      |     | 72.5  | SNP genotyping                             |
|                      | BBO-036 |     |     |      |     | 59.9  | SNP genotyping                             |
|                      | BBO-050 |     |     |      |     | 58.1  | SNP genotyping                             |
|                      | BBO-055 |     |     |      |     | 63.8  | SNP genotyping                             |
|                      | BBO-065 | 34  | 9.6 | 274  | 10  | 48.0  | RNAseq of biopsy specimens, SNP genotyping |
|                      | BBO-066 | 95  | 10  | 1035 | 9.9 | 62.9  | RNAseq of biopsy specimens, SNP genotyping |
|                      | BBO-070 | 127 | 9.9 | 201  | 9.6 | 57.4  | RNAseq of biopsy specimens, SNP genotyping |
|                      | BBO-072 | 165 | 9.9 | 71   | 9.7 | 55.8  | RNAseq of biopsy specimens, SNP genotyping |
|                      | BBO-077 | 47  | 10  | 408  | 8.7 | 63.9  | RNAseq of biopsy specimens, SNP genotyping |
|                      | BBO-086 | 125 | 10  | 385  | 8.1 | 59.4  | RNAseq of biopsy specimens, SNP genotyping |
|                      | BBO-087 | 126 | 9.9 | 509  | 8.1 | 63.1  | RNAseq of biopsy specimens, SNP genotyping |
|                      | BBO-090 | 99  | 9.6 | 159  | 9.3 | 54.5  | RNAseq of biopsy specimens, SNP genotyping |
|                      | BBO-092 |     |     | 188  | 7.0 |       | RNAseq of biopsy specimens                 |
|                      | BBO-094 | 62  | 10  | 617  | 6.7 | 71.9  | RNAseq of biopsy specimens, SNP genotyping |
|                      | EA1     |     |     |      |     | 57.6  | SNP genotyping                             |
|                      | EA2     |     |     |      |     | 71.8  | SNP genotyping                             |
|                      | EA3     |     |     |      |     | 42.6  | SNP genotyping                             |
|                      | EA4     |     |     |      |     | 42.5  | SNP genotyping                             |
|                      | EA5     |     |     |      |     | 54.7  | SNP genotyping                             |
|                      | EA6     |     |     |      |     | 67.3  | SNP genotyping                             |
|                      | EA7     |     |     |      |     | 47.8  | SNP genotyping                             |

|                      |                        |                 |          |                 |     |      |                                            |
|----------------------|------------------------|-----------------|----------|-----------------|-----|------|--------------------------------------------|
| Group C<br>(BE only) | EA8                    |                 |          |                 |     | 43.0 | SNP genotyping                             |
|                      | EA9                    |                 |          |                 |     | 48.2 | SNP genotyping                             |
|                      | EA10                   |                 |          |                 |     | 89.2 | SNP genotyping                             |
|                      | EA11                   |                 |          |                 |     | 73.2 | SNP genotyping                             |
|                      | EA12                   |                 |          |                 |     | 69.0 | SNP genotyping                             |
|                      | EA13                   |                 |          |                 |     | 67.6 | SNP genotyping                             |
|                      | EA14                   |                 | 239 / 30 | 9.3 / 7.3       |     |      | Acid exposure experiment, including RNAseq |
|                      | EA15                   |                 | 206 / 70 | 9.3 / 9.2       |     |      | Acid exposure experiment, including RNAseq |
|                      | EA16                   |                 | 141 / 30 | 9.8 / 8.3       |     |      | Acid exposure experiment, including RNAseq |
|                      | BBE-001                |                 | 260      | 8.4             |     | 39.3 | RNAseq of biopsy specimens, SNP genotyping |
|                      | BBE-017                | 39              | 7.8      | 14 <sup>B</sup> | 6.3 |      | RNAseq of biopsy specimens, SNP genotyping |
|                      | BBE-021                | 209             | 9.3      | 756             | 8.3 |      | RNAseq of biopsy specimens, SNP genotyping |
|                      | BBE-023                | 163             | 9.1      | 382             | 7.4 |      | RNAseq of biopsy specimens, SNP genotyping |
|                      | BBE-028                | 71              | 9.1      | 132             | 7.9 |      | RNAseq of biopsy specimens, SNP genotyping |
|                      | BBE-043                | 162             | 9.1      | 264             | 7.1 |      | RNAseq of biopsy specimens, SNP genotyping |
|                      | BBE-053                | 65              | 9.4      | 112             | 7.5 |      | RNAseq of biopsy specimens, SNP genotyping |
|                      | BBE-079                | 16 <sup>B</sup> | 8.0      | 88              | 8.5 |      | RNAseq of biopsy specimens, SNP genotyping |
|                      | BBE-080                |                 |          | 376             | 9.4 |      | RNAseq of biopsy specimens, SNP genotyping |
|                      | BBE-098                | 92              | 9.0      | 97              | 7.3 |      | RNAseq of biopsy specimens, SNP genotyping |
| Controls             | Control 1              |                 |          |                 |     | 22.0 | SNP genotyping                             |
|                      | Control 2              |                 |          |                 |     | 47.8 | SNP genotyping                             |
|                      | Control 3              |                 |          |                 |     | 93.2 | SNP genotyping                             |
|                      | Control 1 <sup>A</sup> |                 | 31 / 13  | 9.0 / 7.2       |     |      | Acid exposure experiment, including RNAseq |
|                      | Control 2 <sup>A</sup> |                 | 223 / 66 | 9.3 / 8.3       |     |      | Acid exposure experiment, including RNAseq |
|                      | Control 3 <sup>A</sup> |                 | 173 / 48 | 9.0 / 8.1       |     |      | Acid exposure experiment, including RNAseq |

Group A = patients with esophageal atresia (EA) and Barrett's esophagus (BE); group B = patients with EA without BE; and group C = patients with BE without EA in history. SQ = squamous cell epithelium, GEJ = gastroesophageal junction, RIN = RNA integrity number. A The polygenetic risk score of these individuals was respectively 1.19, 3.18 and 3.26 for the patients, and 1.73, 3.30 and 4.80 for the controls. RNA amount is presented as non-exposed / acid-exposed. B Two outliers were excluded for the differential expression and pathway enrichment analysis (BBE-017 and BBE-079). See Supplementary Table S12 for a phenotypical description of these patients. Fibro; fibroblasts.

**Table S13.** Quality report of RNA sequencing data from esophageal biopsy specimens.

| Patient | Read count | Mapped to genes (%) |
|---------|------------|---------------------|
|---------|------------|---------------------|

---

|         |             |       |
|---------|-------------|-------|
| BBO-021 | 89,974,680  | 97.17 |
| BBO-027 | 80,585,282  | 97.48 |
| BBO-038 | 80,968,668  | 96.93 |
| BBO-053 | 81,423,510  | 97.22 |
| BBO-058 | 80,364,912  | 97.68 |
| BBO-060 | 80,402,720  | 97.68 |
| BBO-061 | 80,505,706  | 96.79 |
| BBO-063 | 79,694,064  | 97.46 |
| BBO-074 | 80,475,762  | 97.70 |
| BBO-080 | 81,389,838  | 94.77 |
| BBO-065 | 80,280,398  | 97.89 |
| BBO-066 | 81,411,852  | 98.35 |
| BBO-070 | 80,666,032  | 97.85 |
| BBO-072 | 80,447,282  | 98.00 |
| BBO-077 | 95,542,940  | 97.57 |
| BBO-086 | 82,468,060  | 97.09 |
| BBO-087 | 101,875,962 | 97.40 |
| BBO-090 | 80,153,816  | 97.66 |
| BBO-092 | 79,295,354  | 97.30 |
| BBO-094 | 114,411,054 | 98.01 |
| BBE-001 | 81,928,370  | 97.76 |
| BBE-017 | 87,733,270  | 96.65 |
| BBE-021 | 104,996,190 | 97.70 |
| BBE-023 | 88,391,266  | 97.54 |
| BBE-028 | 80,379,380  | 97.38 |
| BBE-043 | 123,662,676 | 97.63 |
| BBE-053 | 81,052,774  | 98.13 |
| BBE-079 | 96,697,812  | 97.23 |
| BBE-080 | 89,275,284  | 97.50 |
| BBE-098 | 79,081,692  | 97.38 |
| BBO-007 | 79,711,864  | 97.53 |
| BBO-038 | 91,284,342  | 97.27 |
| BBO-053 | 99,939,582  | 97.49 |
| BBO-058 | 80,855,640  | 97.90 |
| BBO-060 | 80,017,504  | 97.40 |
| BBO-063 | 91,121,504  | 97.70 |
| BBO-074 | 79,902,188  | 97.61 |
| BBO-080 | 79,890,396  | 98.28 |
| BBO-065 | 122,715,740 | 97.88 |
| BBO-066 | 80,617,726  | 97.72 |
| BBO-070 | 98,784,886  | 97.65 |
| BBO-072 | 81,879,960  | 98.12 |
| BBO-077 | 81,009,706  | 98.08 |
| BBO-086 | 165,874,334 | 98.09 |
| BBO-087 | 81,516,230  | 97.80 |
| BBO-090 | 105,864,940 | 98.14 |
| BBO-094 | 109,429,738 | 98.18 |
| BBE-017 | 81,199,760  | 97.79 |
| BBE-021 | 89,550,670  | 97.66 |
| BBE-023 | 81,142,760  | 97.45 |
| BBE-028 | 83,039,748  | 97.36 |
| BBE-043 | 86,493,406  | 97.89 |
| BBE-053 | 80,517,098  | 97.82 |



|         |            |       |
|---------|------------|-------|
| BBE-079 | 62,471,354 | 96.87 |
| BBE-098 | 80,434,098 | 97.58 |

**Table S14.** Results of RNA isolation from fibroblast of the acid exposure experiments in terms of quantity and quality, plus a quality report of RNA sequencing data.

| Sample                 | Concentration (ng/uL) | RIN | Read count  | Mapped to genes (%) |
|------------------------|-----------------------|-----|-------------|---------------------|
| Acid-exposed patient 1 | 30                    | 7.3 | 128,303,494 | 98.93               |
| Acid-exposed patient 2 | 70                    | 9.2 | 103,308,260 | 98.99               |
| Acid-exposed patient 3 | 30                    | 8.3 | 87,959,820  | 98.93               |
| Acid-exposed control 1 | 17                    | 7.2 | 80,815,128  | 99.07               |
| Acid-exposed control 2 | 66                    | 8.3 | 80,630,850  | 99.06               |
| Acid-exposed control 3 | 48                    | 8.1 | 155,906,284 | 98.78               |
| Non-exposed patient 1  | 239                   | 9.3 | 101,489,322 | 94.55               |
| Non-exposed patient 2  | 206                   | 9.3 | 162,746,478 | 94.87               |
| Non-exposed patient 3  | 141                   | 9.8 | 121,773,766 | 94.59               |
| Non-exposed control 1  | 31                    | 9.0 | 131,980,322 | 95.82               |
| Non-exposed control 2  | 223                   | 9.3 | 134,581,046 | 95.67               |
| Non-exposed control 3  | 173                   | 9.0 | 124,560,450 | 95.10               |

RIN = RNA integrity number. See Supplementary Table S12 for a phenotypical description of these patients.

**Table S15.** Number of significantly differently expressed genes when comparing the different subgroups.

| Comparison | Significant Genes (n) | Alternative Settings                | Overlapping Disease and Developmental Genes <sup>A</sup>                                        |
|------------|-----------------------|-------------------------------------|-------------------------------------------------------------------------------------------------|
| I vs. II   | 3191                  |                                     | <i>BMP4, CDX1, CDX2, CFTR, EGFR, FOXF1, GATA6, HOXA13, MYC, PLCE1, SOX2</i>                     |
| I vs. III  | 20 <sup>B</sup>       |                                     | -                                                                                               |
| I vs. IV   | 911                   |                                     | <i>BMP4, FOXF1, GATA6</i>                                                                       |
| I vs. V    | 80 <sup>B</sup>       |                                     | -                                                                                               |
| I vs. VI   | 5617                  |                                     | <i>BMP4, CCND1, CDX1, CDX2, CFTR, EGFR, FOXF1, GATA6, HOXA13, MYC, PLCE1, SOX2</i>              |
| II vs. III | 4446                  |                                     | <i>ABCC5, BMP4, CCND1, CDX1, CDX2, CFTR, EGFR, FOXF1, GATA6, HOXA13, MYC, PLCE1, SOX2</i>       |
| II vs. IV  | 631 <sup>B</sup>      |                                     | <i>CDX1, CDX2, CFTR, HOXA13, SOX2</i>                                                           |
| II vs. V   | 3657                  |                                     | <i>BMP4, CDX1, CDX2, CFTR, FOXF1, GATA6, HOXA13, MYC, PLCE1</i>                                 |
| II vs. VI  | 981                   | FC <-3 or >3 → n = 514 <sup>B</sup> | -                                                                                               |
| III vs. IV | 1677                  |                                     | <i>ABCC5, BMP4, FOXF1, GATA6</i>                                                                |
| III vs. V  | 165                   |                                     | -                                                                                               |
| III vs. VI | 6090                  |                                     | <i>ABCC5, BMP4, CCND1, CDX1, CDX2, CFTR, EGFR, FOXF1, GATA6, GSTP, HOXA13, MYC, PLCE1, SOX2</i> |
| IV vs. V   | 973                   | FC <-3 or >3 → n = 521 <sup>B</sup> | <i>BMP4, FOXF1, GATA6</i>                                                                       |
| IV vs. VI  | 3654                  |                                     | <i>BMP4, CCND1, CDX1, CDX2, CFTR, EGFR, FOXF1, GSTP, HOXA13, MYC, PLCE1, SOX2</i>               |
| V vs. VI   | 5599                  |                                     | <i>BMP4, CDX1, CDX2, CFTR, FOXF1, GATA6, GSTP, HOXA13, MYC, PLCE1, SOX2</i>                     |

Settings: max group mean >2, fold change (FC) <-1.5 or >1.5, false discovery rate (FDR) *p*-value <0.05. <sup>A</sup> Associated polymorphisms, previously found with genome

wide association studies (Supplementary Material S2) <sup>B</sup> Uploaded to Ingenuity Pathway Analysis. Group A = patients with esophageal atresia (EA) and Barrett's esophagus (BE), group B = patients with EA without BE, group C = patients with BE without EA in history, I = squamous cell epithelium (SQ) samples from group A, II = gastroesophageal junction (GEJ) samples from group A, III = SQ samples from group B, IV = GEJ samples from group B, V = SQ samples from group C, VI = GEJ samples from group C.

**Table S16.** Canonical pathways, significantly enriched by differentially expressed genes, and corresponding diseases and bio functions, with a significantly increased or decreased activations.

|                            | n = 353                                                                 | -log(p-value) | z-score |
|----------------------------|-------------------------------------------------------------------------|---------------|---------|
| Canonical pathways         | SPINK1 Pancreatic Cancer Pathway *                                      | 15.7          | 0       |
|                            | Intrinsic Prothrombin Activation Pathway                                | 7.92          | 1.897   |
|                            | Neuroprotective Role of THOP1 in Alzheimer's Disease                    | 6.83          | 3.207   |
|                            | Cholecystokinin/Gastrin-mediated Signaling                              | 4.38          | 2.111   |
|                            | LXR/RXR Activation *                                                    | 4.31          | -2.111  |
|                            | Toll-like Receptor Signaling #                                          | 3.73          | 1.89    |
|                            | p38 MAPK Signaling #                                                    | 3.72          | 1.897   |
|                            | Adrenomedullin signaling pathway                                        | 3.56          | 2.309   |
|                            | Acute Phase Response Signaling #                                        | 3.39          | 0.632   |
|                            | IL-6 Signaling #                                                        | 2.89          | 1.667   |
|                            | PPAR Signaling                                                          | 2.81          | -1.414  |
|                            | Production of Nitric Oxide and Reactive Oxygen Species in Macrophages # | 2.68          | 0.302   |
|                            | Dendritic Cell Maturation #                                             | 2.27          | 2.333   |
|                            | Retinoate Biosynthesis I #                                              | 2.27          | 2       |
|                            | HMGB1 Signaling #                                                       | 2.09          | 1.633   |
|                            | HIPPO signaling *                                                       | 2.05          | -1      |
|                            | Retinol Biosynthesis #                                                  | 1.95          | -1      |
|                            | Aryl Hydrocarbon Receptor Signaling *                                   | 1.51          | -1      |
|                            | Signaling by Rho Family GTPases #                                       | 1.49          | 2.333   |
|                            | NF-κB Signaling #                                                       | 1.45          | 2.121   |
|                            | Sphingosine-1-phosphate Signaling # *                                   | 1.44          | 2.236   |
|                            | Osteoarthritis Pathway #                                                | 1.44          | -0.378  |
|                            | Nicotine Degradation II                                                 | 1.33          | 2       |
| Diseases and bio functions | Migration of cells                                                      | 2,00E-10      | 4.741   |
|                            | Cell movement                                                           | 9,38E-10      | 4.737   |
|                            | Migration of tumor cell lines                                           | 4,85E-07      | 4.421   |
|                            | Cell movement of tumor cell lines                                       | 6,48E-08      | 3.832   |
|                            | Organization of cytoskeleton                                            | 3,57E-04      | 3.733   |
|                            | Organization of cytoplasm                                               | 2,07E-03      | 3.733   |
|                            | Invasion of tumor cell lines                                            | 6,79E-06      | 3.658   |
|                            | Cell movement of blood cells                                            | 1,42E-04      | 3.430   |
|                            | Leukocyte migration                                                     | 2,01E-04      | 3.344   |
|                            | Cell movement of leukocytes                                             | 8,70E-05      | 3.331   |
|                            | Chemotaxis                                                              | 6,96E-05      | 3.209   |
|                            | Chemotaxis of leukocytes                                                | 1,13E-04      | 3.108   |
|                            | Cell movement of myeloid cells                                          | 8,49E-04      | 3.071   |
|                            | Invasion of cells                                                       | 2,53E-08      | 3.057   |
|                            | Homing of cells                                                         | 9,80E-05      | 3.054   |
|                            | Formation of skin                                                       | 5,53E-40      | 3.042   |
|                            | Chemotaxis of myeloid cells                                             | 1,92E-04      | 2.939   |
|                            | Inflammatory response                                                   | 4,46E-07      | 2.803   |
|                            | Chemotaxis of phagocytes                                                | 1,08E-04      | 2.690   |

|                                            |          |        |
|--------------------------------------------|----------|--------|
| Cell movement of breast cancer cell lines  | 2,56E-04 | 2.573  |
| Formation of epidermis                     | 5,06E-24 | 2.433  |
| Neoplasia of tumor cell lines              | 2,69E-05 | 2.384  |
| Cell movement of mononuclear leukocytes    | 1,69E-03 | 2.280  |
| Differentiation of epithelial cells        | 3,23E-19 | 2.269  |
| Cell movement of granulocytes              | 3,01E-05 | 2.263  |
| Chemotaxis of granulocytes                 | 3,52E-05 | 2.260  |
| Chemotaxis of neutrophils                  | 3,05E-04 | 2.254  |
| Cell proliferation of carcinoma cell lines | 2,31E-05 | 2.186  |
| Advanced malignant tumor                   | 9,25E-04 | 2.161  |
| Neoplasia of cells                         | 2,25E-04 | 2.144  |
| Activation of phagocytes                   | 2,94E-05 | 2.119  |
| Cancer of cells                            | 5,83E-04 | 2.114  |
| Differentiation of skin                    | 1,11E-24 | 2.064  |
| Metabolism of eicosanoid                   | 5,05E-04 | 2.026  |
| Allergy                                    | 2,20E-13 | 2.019  |
| Weight loss                                | 7,35E-04 | -2.030 |
| Blister                                    | 1,71E-04 | -2.219 |
| Apoptosis of skin                          | 3,39E-04 | -2.595 |
| Congenital anomaly of digit                | 6,28E-06 | -2.949 |
| Limb defect                                | 1,70E-05 | -3.110 |
| Congenital anomaly of limb                 | 2,57E-07 | -3.110 |

Settings:  $p$ -value  $< 0.05$  ( $= -\log(p\text{-value}) > 1.3$ ),  $Z$ -score  $< -2$  or  $> 2$  (only for diseases and bio functions).  $n$  = total number of canonical pathways significantly enriched by differentially expressed genes, N/A = not applicable,  $z$ -score could not be calculated. Group A = patients with esophageal atresia (EA) and Barrett's esophagus (BE), group C = patients with BE without EA in history, I = squamous cell epithelium (SQ) samples from group A, II = gastroesophageal junction (GEJ) samples from group A, III = SQ samples from group B, IV = GEJ samples from group B, V = SQ samples from group C, VI = GEJ samples from group C. \* = involved in oncological processes, # = involved inflammatory processes.

**Table S17.** Canonical pathways, enriched by differentially expressed genes.

| Acid-exposed vs. non-exposed<br>(all samples) (n = 578) <sup>A</sup> | Canonical Pathways                                         | $-\log(p\text{-value})$ | $z\text{-score}$ |
|----------------------------------------------------------------------|------------------------------------------------------------|-------------------------|------------------|
|                                                                      |                                                            |                         |                  |
|                                                                      | EIF2 Signaling                                             | 43.3                    | 5.338            |
|                                                                      | Coronavirus Pathogenesis Pathway                           | 19                      | -2.722           |
|                                                                      | Oxidative Phosphorylation                                  | 15.8                    | 5.642            |
|                                                                      | Kinetochore Metaphase Signaling Pathway                    | 14.8                    | -3.452           |
|                                                                      | Sirtuin Signaling Pathway                                  | 9.8                     | -3               |
|                                                                      | Cell Cycle: G2/M DNA Damage Checkpoint Regulation          | 7.99                    | 2.982            |
|                                                                      | Unfolded protein response                                  | 6.84                    | 2.183            |
|                                                                      | NRF2-mediated Oxidative Stress Response                    | 6.51                    | 2.683            |
|                                                                      | IL-6 Signaling                                             | 5.02                    | 2.117            |
|                                                                      | ILK Signaling                                              | 3.41                    | 3.413            |
|                                                                      | RAN Signaling                                              | 3.17                    | -2.646           |
|                                                                      | Death Receptor Signaling                                   | 2.89                    | -2.065           |
|                                                                      | Hypoxia Signaling in the Cardiovascular System             | 2.74                    | 2.646            |
|                                                                      | BAG2 Signaling Pathway                                     | 264                     | 2.111            |
|                                                                      | PPAR Signaling                                             | 2.57                    | -2.524           |
|                                                                      | PCP pathway                                                | 2.33                    | 2.309            |
|                                                                      | Cell Cycle Control of Chromosomal Replication              | 2.15                    | -3.464           |
|                                                                      | IL-17 Signaling                                            | 2.07                    | 3.157            |
|                                                                      | Role of PKR in Interferon Induction and Antiviral Response | 1.98                    | -2.236           |
|                                                                      | Inhibition of ARE-Mediated mRNA Degradation Pathway        | 1.83                    | 3.130            |

|                                                                |                                                                                |      |        |
|----------------------------------------------------------------|--------------------------------------------------------------------------------|------|--------|
| Patients vs. controls<br>(acid-exposed) (n = 258) <sup>B</sup> | MIF Regulation of Innate Immunity                                              | 1.74 | 2.333  |
|                                                                | Angiopoietin Signaling                                                         | 1.53 | -2.121 |
|                                                                | Regulation Of The Epithelial Mesenchymal Transition In Development Pathway     | 1.48 | 2.496  |
|                                                                | Dendritic Cell Maturation                                                      | 4.6  | -0.707 |
|                                                                | Type I Diabetes Mellitus Signaling                                             | 4.09 | N/A    |
|                                                                | T Helper Cell Differentiation                                                  | 3.97 | N/A    |
|                                                                | Role of Macrophages, Fibroblasts and Endothelial Cells in Rheumatoid Arthritis | 3.71 | N/A    |
|                                                                | Hepatic Fibrosis / Hepatic Stellate Cell Activation                            | 3.7  | N/A    |
|                                                                | Graft-versus-Host Disease Signaling                                            | 3.6  | N/A    |
|                                                                | Role of Osteoblasts, Osteoclasts and Chondrocytes in Rheumatoid Arthritis      | 3.28 | N/A    |
| Patients vs. controls<br>(non-exposed) (n = 314) <sup>B</sup>  | PD-1, PD-L1 cancer immunotherapy pathway                                       | 3.22 | 1.342  |
|                                                                | Axonal Guidance Signaling                                                      | 2.88 | N/A    |
|                                                                | Coagulation System                                                             | 2.84 | N/A    |
|                                                                | Osteoarthritis Pathway                                                         | 6.98 | -1.265 |
|                                                                | Hepatic Fibrosis / Hepatic Stellate Cell Activation                            | 5.99 | N/A    |
|                                                                | Tumor Microenvironment Pathway                                                 | 5.34 | 0      |
|                                                                | Axonal Guidance Signaling                                                      | 4.96 | N/A    |
|                                                                | HOTAIR Regulatory Pathway                                                      | 4.82 | -1     |
|                                                                | Role of Osteoblasts, Osteoclasts and Chondrocytes in Rheumatoid Arthritis      | 4.53 | N/A    |
|                                                                | Colorectal Cancer Metastasis Signaling                                         | 3.99 | -0.333 |
|                                                                | Role of Macrophages, Fibroblasts and Endothelial Cells in Rheumatoid Arthritis | 3.87 | N/A    |
|                                                                | Caveolar-mediated Endocytosis Signaling                                        | 3.29 | N/A    |
|                                                                | HIF1 $\alpha$ Signaling                                                        | 3.26 | -0.707 |

<sup>A</sup> Settings:  $p$ -value  $< 0.05$  ( $= -\log(p\text{-value}) > 1.3$ ),  $z$ -score  $< -2$  or  $> 2$ . <sup>B</sup> Settings:  $p$ -value  $< 0.05$  ( $= -\log(p\text{-value}) > 1.3$ ), top 10 pathways presented. n = total number of canonical pathways significantly enriched by differentially expressed genes. N/A = not applicable,  $z$ -score could not be calculated.

**Table S18.** Canonical pathways, significantly enriched by differentially expressed genes.

| Canonical Pathways (n = 173)                                                          | $-\log(p\text{-value})$ | $z\text{-score}$ |
|---------------------------------------------------------------------------------------|-------------------------|------------------|
| Communication between Innate and Adaptive Immune Cells <sup>#</sup>                   | 4.85                    | N/A              |
| Graft-versus-Host Disease Signaling <sup>#</sup>                                      | 4.77                    | N/A              |
| Dendritic Cell Maturation <sup>#</sup>                                                | 4.56                    | 0.816            |
| LXR/RXR Activation <sup>*</sup>                                                       | 4.36                    | -2.236           |
| Role of Hypercytokinemia/hyperchemokine in the Pathogenesis of Influenza <sup>#</sup> | 3.77                    | 0                |
| Altered T Cell and B Cell Signaling in Rheumatoid Arthritis <sup>#</sup>              | 3.70                    | N/A              |
| Hepatic Fibrosis Signaling Pathway                                                    | 3.69                    | 1.89             |
| Granulocyte Adhesion and Diapedesis <sup>#</sup>                                      | 3.63                    | N/A              |
| PPAR Signaling                                                                        | 3.44                    | -2               |
| Airway Pathology in Chronic Obstructive Pulmonary Disease                             | 3.25                    | N/A              |
| IL-6 Signaling <sup>#</sup>                                                           | 3.14                    | 2                |
| Atherosclerosis Signaling                                                             | 3.13                    | N/A              |
| LPS/IL-1 Mediated Inhibition of RXR Function <sup>#</sup>                             | 3.11                    | N/A              |
| IL-10 Signaling <sup>#</sup>                                                          | 2.83                    | N/A              |
| T Helper Cell Differentiation <sup>#</sup>                                            | 2.78                    | N/A              |
| TR/RXR Activation <sup>#</sup>                                                        | 2.60                    | N/A              |
| Hepatic Cholestasis                                                                   | 2.52                    | N/A              |
| Hepatic Fibrosis / Hepatic Stellate Cell Activation                                   | 2.52                    | N/A              |
| PD-1, PD-L1 cancer immunotherapy pathway <sup>*</sup>                                 | 2.32                    | N/A              |

|                                                                                            |      |     |
|--------------------------------------------------------------------------------------------|------|-----|
| Role of Osteoblasts, Osteoclasts and Chondrocytes in Rheumatoid Arthritis                  | 2.28 | N/A |
| Type I Diabetes Mellitus Signaling                                                         | 2.26 | N/A |
| Coagulation System                                                                         | 2.25 | N/A |
| B Cell Development <sup>#</sup>                                                            | 2.23 | N/A |
| p38 MAPK Signaling <sup>#</sup>                                                            | 2.19 | N/A |
| Antigen Presentation Pathway <sup>#</sup>                                                  | 2.16 | N/A |
| FXR/RXR Activation <sup># *</sup>                                                          | 2.11 | N/A |
| Intrinsic Prothrombin Activation Pathway                                                   | 2.10 | N/A |
| Th2 Pathway <sup>#</sup>                                                                   | 2.02 | N/A |
| Autoimmune Thyroid Disease Signaling <sup>#</sup>                                          | 1.97 | N/A |
| Role of Cytokines in Mediating Communication between Immune Cells <sup>#</sup>             | 1.89 | N/A |
| Neuroinflammation Signaling Pathway <sup>#</sup>                                           | 1.80 | -2  |
| HMGB1 Signaling <sup>#</sup>                                                               | 1.80 | N/A |
| Th1 and Th2 Activation Pathway <sup>#</sup>                                                | 1.76 | N/A |
| Role of Macrophages, Fibroblasts and Endothelial Cells in Rheumatoid Arthritis             | 1.74 | N/A |
| Calcium-induced T Lymphocyte Apoptosis <sup># *</sup>                                      | 1.72 | N/A |
| NF-κB Signaling <sup>#</sup>                                                               | 1.70 | N/A |
| Acute Phase Response Signaling <sup>#</sup>                                                | 1.70 | N/A |
| Role of NFAT in Regulation of the Immune Response <sup>#</sup>                             | 1.69 | N/A |
| Axonal Guidance Signaling                                                                  | 1.68 | N/A |
| Regulation Of The Epithelial Mesenchymal Transition By Growth Factors Pathway <sup>*</sup> | 1.65 | N/A |
| Clathrin-mediated Endocytosis Signaling <sup>*</sup>                                       | 1.62 | N/A |
| Agranulocyte Adhesion and Diapedesis <sup>*</sup>                                          | 1.62 | N/A |
| TREM1 Signaling <sup>#</sup>                                                               | 1.62 | N/A |
| Toll-like Receptor Signaling <sup>#</sup>                                                  | 1.61 | N/A |
| BEX2 Signaling Pathway <sup>*</sup>                                                        | 1.58 | N/A |
| Pathogenesis of Multiple Sclerosis                                                         | 1.55 | N/A |
| FGF Signaling <sup>*</sup>                                                                 | 1.53 | N/A |
| IL-4 Signaling <sup>#</sup>                                                                | 1.52 | N/A |
| Allograft Rejection Signaling <sup>#</sup>                                                 | 1.51 | N/A |
| Crosstalk between Dendritic Cells and Natural Killer Cells <sup>#</sup>                    | 1.48 | N/A |
| Osteoarthritis Pathway <sup>#</sup>                                                        | 1.47 | N/A |
| OX40 Signaling Pathway <sup>#</sup>                                                        | 1.47 | N/A |
| Bladder Cancer Signaling <sup>*</sup>                                                      | 1.41 | N/A |
| Bile Acid Biosynthesis, Neutral Pathway                                                    | 1.39 | N/A |
| iCOS-iCOSL Signaling in T Helper Cells <sup>#</sup>                                        | 1.31 | N/A |

Settings:  $p$ -value  $< 0.05$  ( $= -\log(p\text{-value}) > 1.3$ ),  $n$  = total number of canonical pathways significantly enriched by differentially expressed genes. N/A = not applicable,  $z$ -score could not be calculated. \* = involved in oncological processes, <sup>#</sup> = involved inflammatory processes.

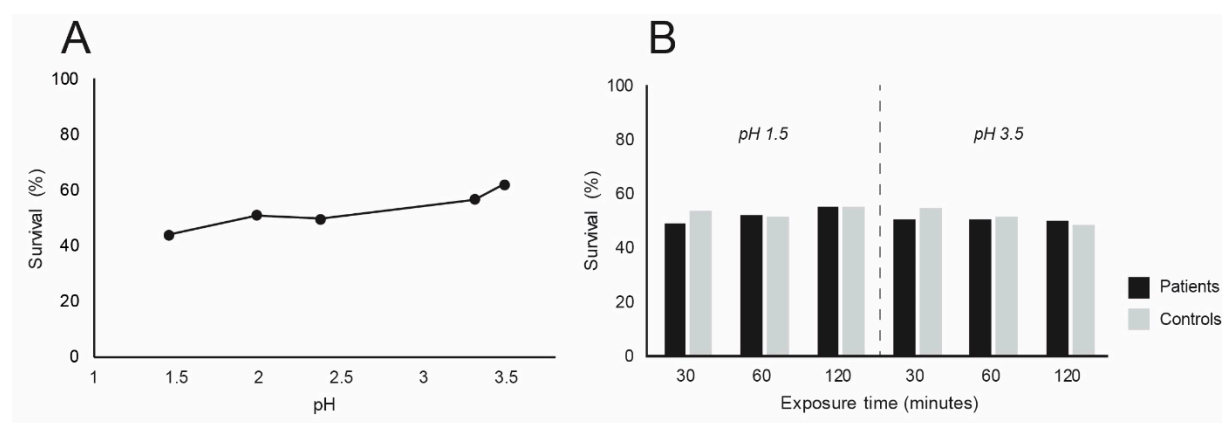



**Figure S1.** Overview of survival rates of fibroblast cells after exposure to pH adjusted medium.

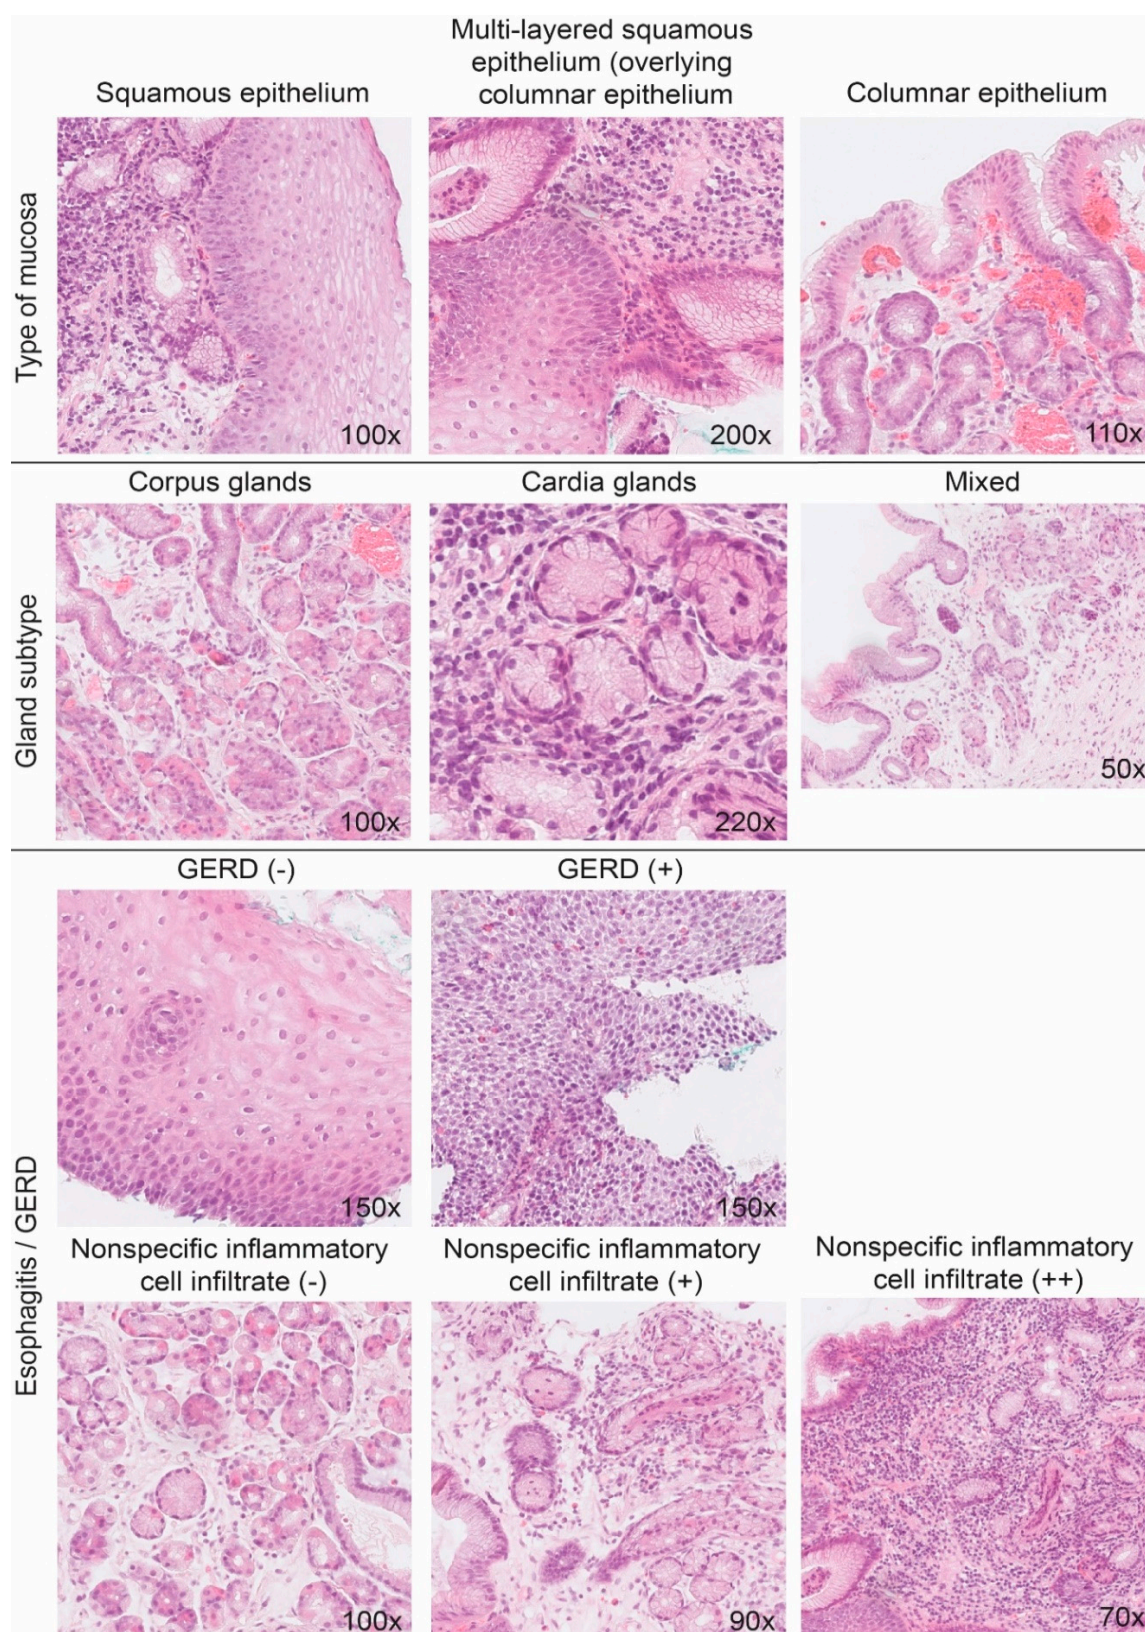

A



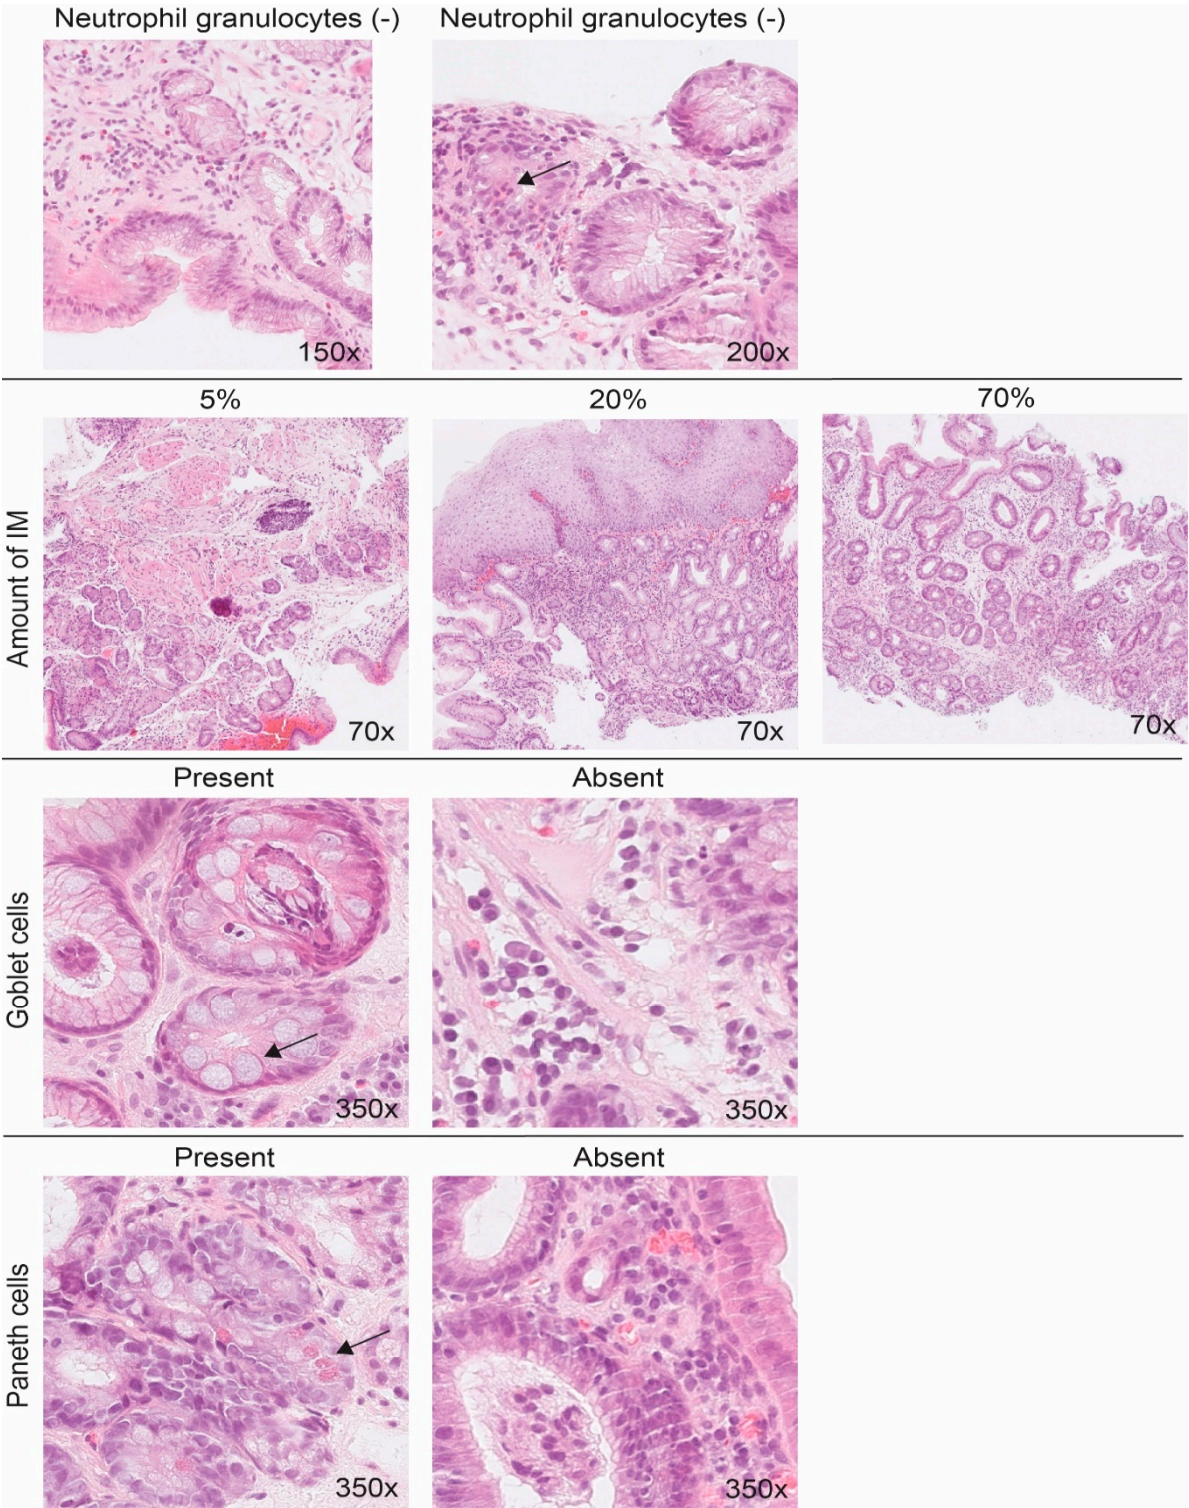

B

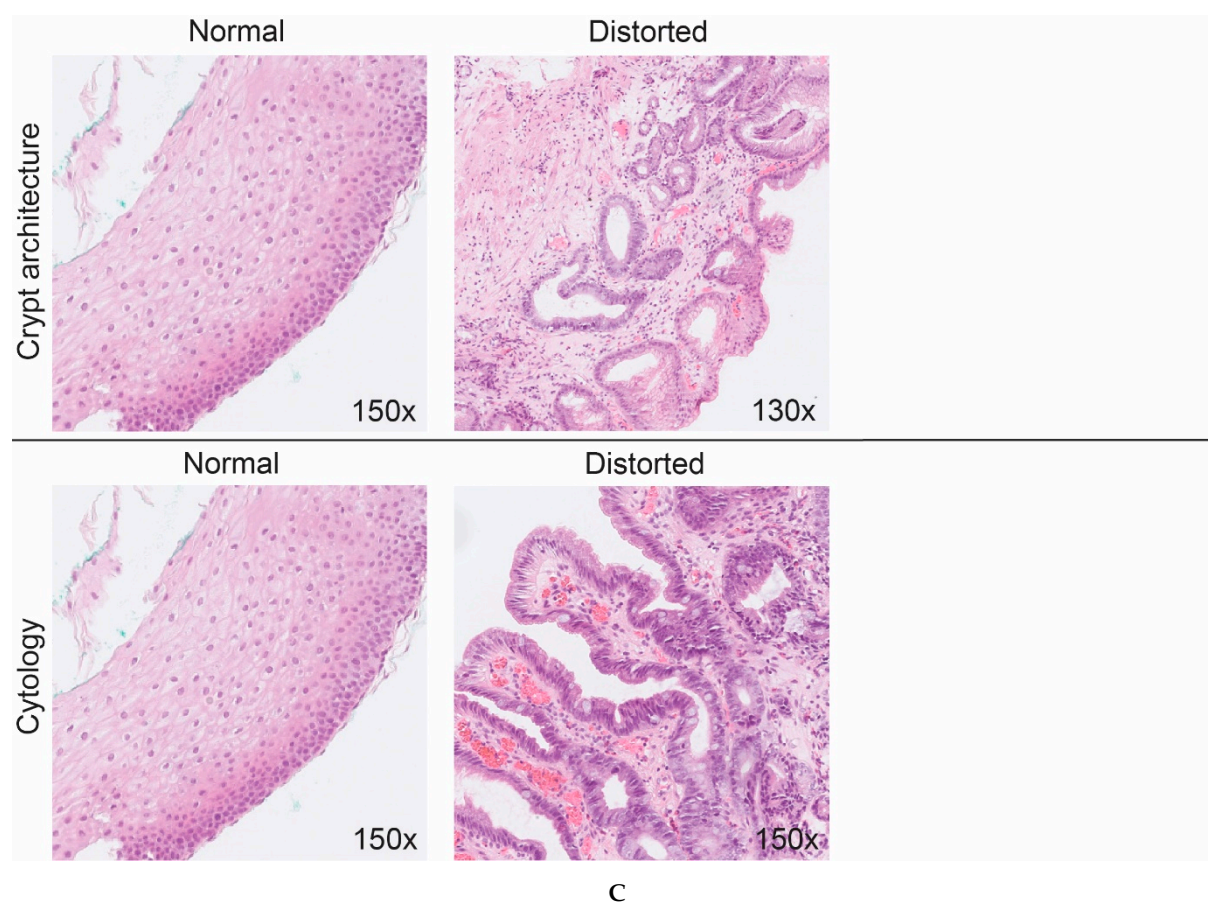

**Figure S2.** part A. Examples of the review-based checklist [6], used for the histopathological assessments of pathology slides of esophageal biopsy specimens, with the magnification of each image. part B. Examples of the review-based checklist [6], used for the histopathological assessments of pathology slides of esophageal biopsy specimens, with the magnification of each image. part C. Examples of the review-based checklist [6], used for the histopathological assessments of pathology slides of esophageal biopsy specimens, with the magnification of each image.



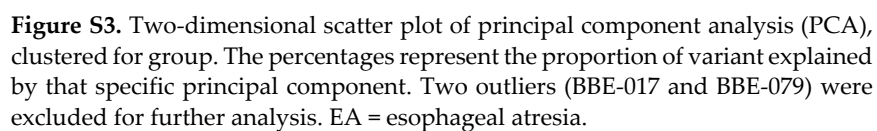

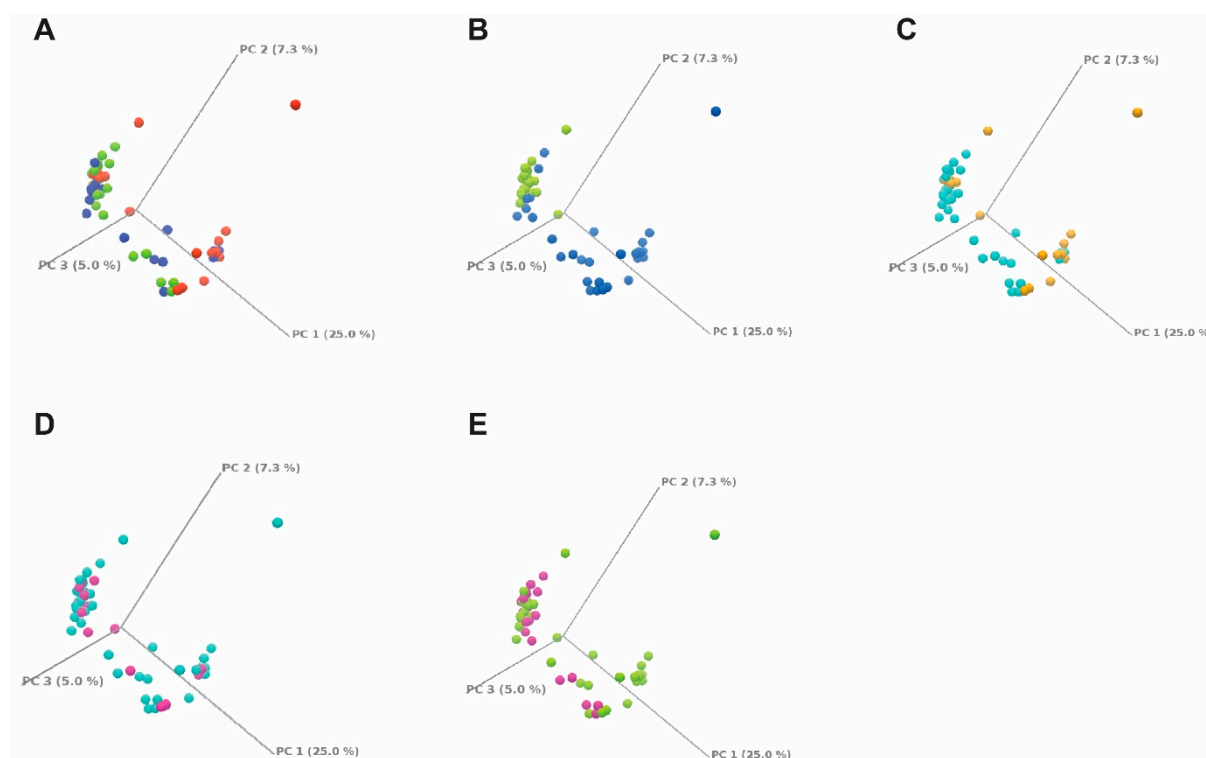

**Figure S4.** Tree-dimensional scatter plot of principal component analysis (PCA), clustered for A = group (esophageal atresia (EA) with Barrett's esophagus (BE); EA only; and BE only), B = origin of biopsy, C = EA in history, D = sex, and E = presence of BE.

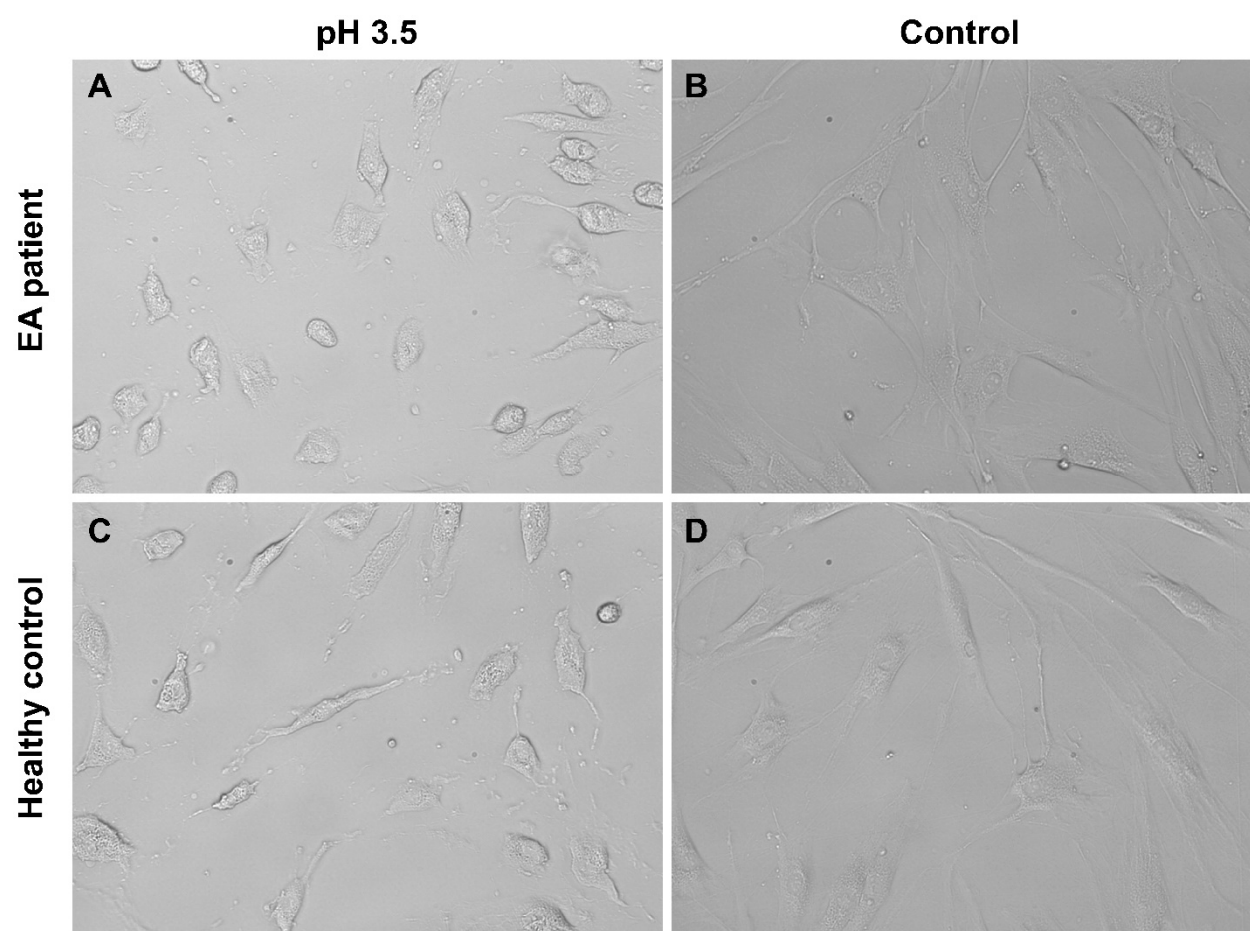

**Figure S5.** Morphology (20x magnification) of fibroblast cells after 30 minutes exposure to acid Dulbecco's Modified Eagle's Medium with pH 3.5 and control medium, of a patient with esophageal atresia (EA, A and B) and a healthy control (C and D).

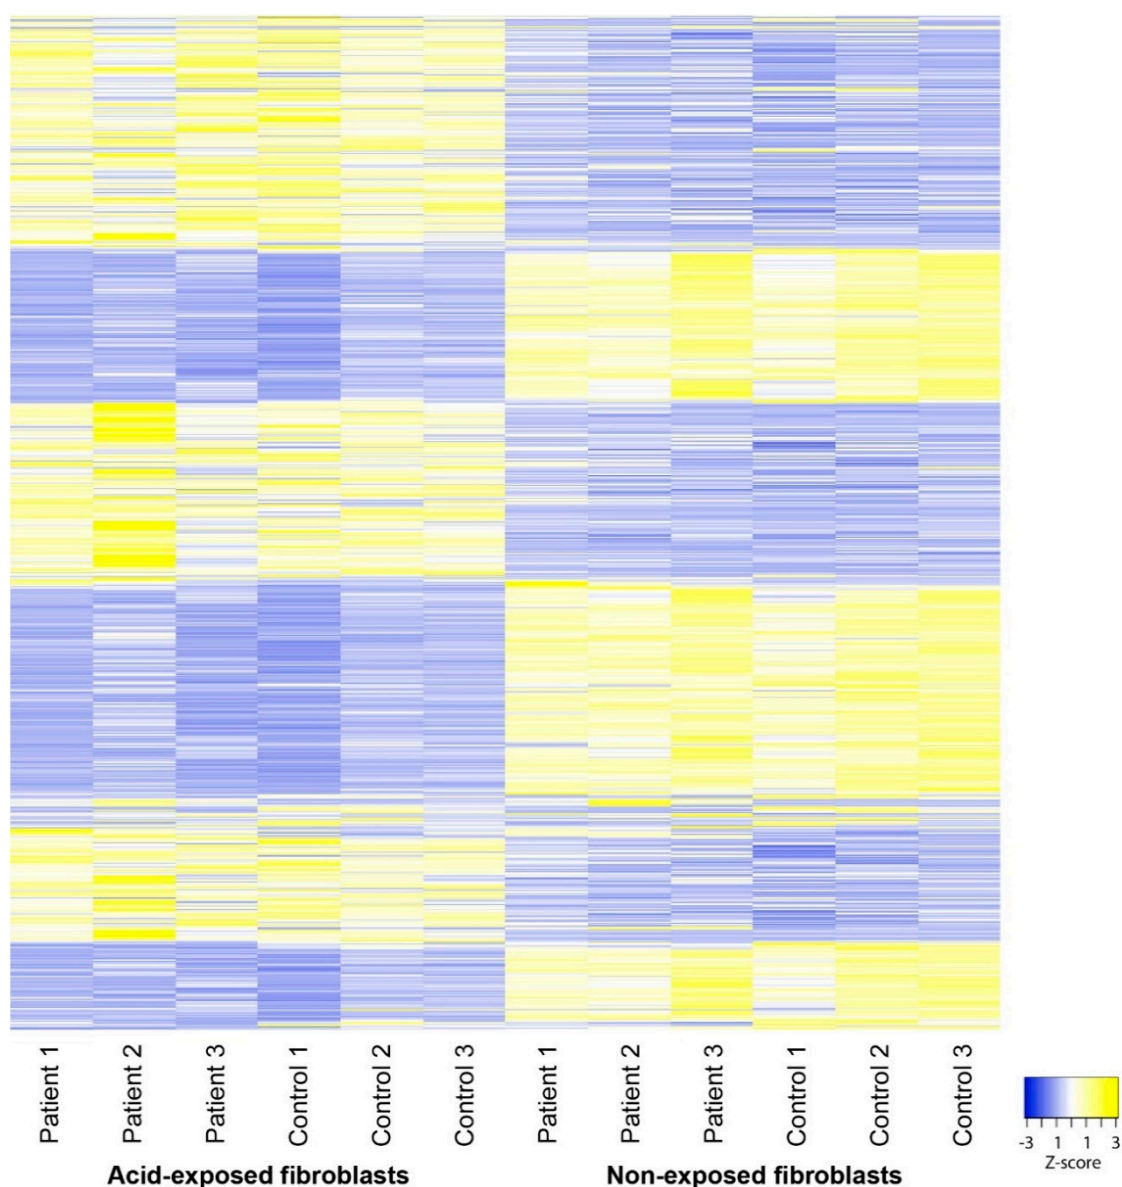

**Figure S6.** Heat map of mean transcript per million (TPM) for fibroblast cells after the in vitro experiment, for a selected gene panel ( $n = 2344$ ). We evaluated all genes ( $n = 2344$ ) of the enriched pathways between GEJ samples of EA/BE patients and GEJ samples of BE only patients. For these 2344 genes, there was a clear difference between upregulated and downregulated genes in fibroblasts after acid exposure, in both EA patients and healthy controls. Gene panel was extracted from the significantly enriched pathways between gastroesophageal junction (GEJ) samples of group A (esophageal atresia (EA) with Barrett's esophagus (BE)) and GEJ samples of group C (BE only), see Supplementary Table S14. Settings: maximum group mean  $>2$ , fold change  $<-1.5$  or  $>1.5$ , false discovery rate  $p$ -value  $<0.05$ , hierarchical clustering by average linkage, distance between rows and columns by Euclidean method.

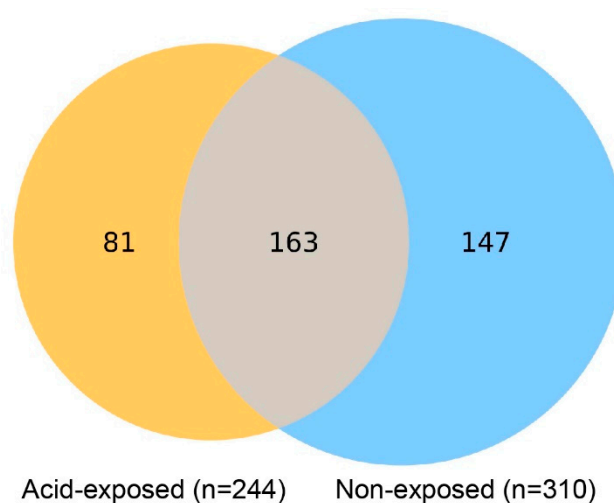

**Figure S7.** Number of differentially expressed genes between patients with EA and healthy controls after acid-exposure (yellow,  $n = 244$ ), and number of differentially expressed genes between patients and controls without exposure (blue,  $n = 310$ ). This leaves 81 genes that were differentially expressed between patients and controls after acid exposure but NOT without exposure.

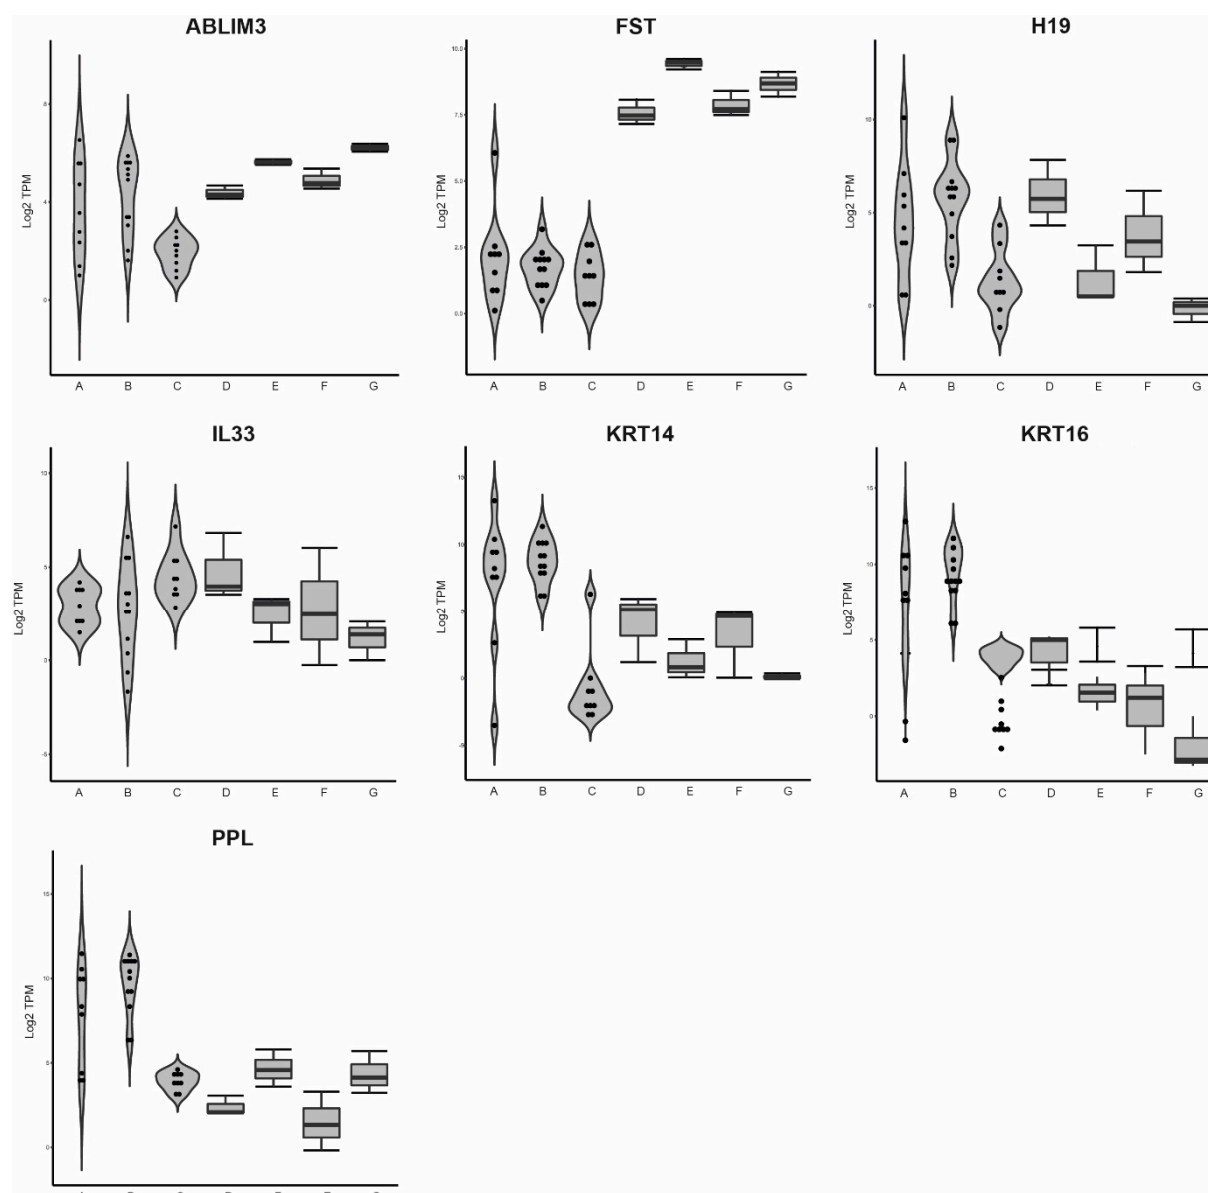

**Figure S8.** Violin plots of gastroesophageal (GEJ) samples (left) and box plots of acid-exposed fibroblasts (right). Of the overlapping enriched pathways of GEJ samples of patients with esophageal atresia (EA) who have developed Barrett's esophagus (BE) compared to BE only patients and acid-exposed fibroblasts of patients compared to controls, seven genes were differentially expressed in both GEJ samples and in fibroblasts. A = EA/BE patients, B = EA only patients, C = BE only, D = EA patients (acid-exposed), E = controls (acid-exposed), F = EA patients (non-exposed), G = Controls (non-exposed). TPM = transcripts per million.

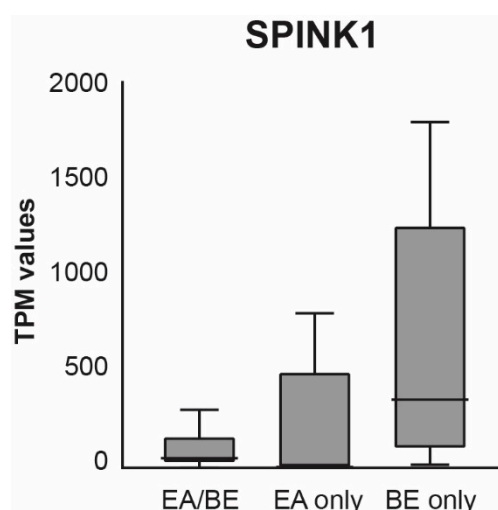

**Figure S9.** SPINK1 is a potential biomarker for Barrett's esophagus. SPINK1 Pancreatic Cancer Pathway was downregulated in EA/BE patients compared with BE only patients (Z-score = -3,  $p < 0.0001$ ). SPINK1 is an enzyme secreted by pancreatic acinar cells, and it is a clinical indicator of malignant disease [72]. The pancreas is derived from the distal foregut, and some of the involved transcription factors during overlap with those of esophageal development [73]. SPINK1 is expressed in the liver, pancreas and the gastrointestinal tract, with increased expression in gastrointestinal tumors [72]. Although it does not seem to be expressed in unaffected esophagus [74], SPINK1 was expressed in the majority of the patients with highest TPM levels in BE only patients (Of note: SPINK1 is somewhat expressed in the stomach [74]. Biopsies of EA only patients were taken from the gastroesophageal junction, which means that biopsies could contain some stomach tissue as well).

### SM1: Sample extraction protocol and storage

All materials used in this study were retrieved from the Biobank Esophageal Atresia (MEC-2015-645) and the Biobank Barrett (MEC-2010-094), in which samples have been stored after written informed consent. During surveillance endoscopies, 2x2 mucosal biopsies were taken from two esophageal sites, one for histological evaluation and one for RNA extraction. The first from the unaffected esophageal squamous cell epithelium (SQ). In patients with EA this biopsy was taken above the original anastomosis. The second set of biopsies was taken from the GEJ or, if present, from Barrett's mucosa (Figure 3 in main manuscript). All biopsies either have been snap frozen in liquid nitrogen directly and stored at -80°C, or have been transferred in a RNeasy Lysis Solution (Qiagen, Venlo, the Netherlands) overnight at 4°C, after which the RNeasy Lysis Solution was removed and the biopsies were stored at -80°C. EDTA blood samples have been collected and stored at -20°C before extraction of genomic DNA.

### SM2: RNA and DNA isolation

DNA was extracted from peripheral blood and fibroblasts using the DNA Mini Kit (Qiagen, Venlo, the Netherlands). DNA quality and quantity was determined with the Thermo Scientific Nano Drop 2000 (ThermoFisher Scientific Inc., Waltham, USA) and Quant-iT<sup>TM</sup> PicoGreen<sup>®</sup> dsDNA kit (Invitrogen, Carlsbad, CA, USA). Total RNA was isolated from the biopsies and fibroblasts using the AllPrep DNA/RNA Mini Kit (Qiagen, Venlo, the Netherlands) or the RNeasy Mini Kit (Qiagen, Venlo, the Netherlands) or the E.Z.N.A.<sup>®</sup> Total RNA Kit I (Omega Bio-tek Inc., Norcross, Georgia, USA), and stored at -80°C. The quantity and quality of the RNA was determined with the Lab-on-Chip RNA 6000 Nano (Agilent Technologies, Santa Clara, USA). Samples with an RNA integrity number (RIN) >6 were prepared and processed for RNA sequencing.

### SM3: SNP genotyping

A total of 200 ng dsDNA was used for single nucleotide polymorphism (SNP) array genotyping analysis using the Infinium Global Screening Array v1.0 or v3.0 (Illumina, Inc. San Diego, USA), according to the manufacturer's standard protocol. Output was generated using Illumina Genome studio v2.0 (Illumina, San Diego, CA, USA). Using SNP-array, we also evaluated DNA copy number variations (CNV) profiles of the biopsies of EA/BE patients and BE patients, if sufficient amounts and quality of DNA was present. We determined genomic stability (the presence or absence of large de novo gains or losses) by inspecting these visually in Biodiscovery Nexus CN10.0 (Biodiscovery Inc., Hawthorne, CA, USA) and comparing them to their germline counterpart. Predisposition loci (and corresponding lead or proxy SNPs) associated with BE, EAC and/or ESCC were derived from the literature (see Supplementary Material S2) [55–69]. We used SNP array genotyping data from patients of group A (EA/BE,  $n = 19$ ), patients of group B (EA only,  $n = 44$ ) and patients of group C (BE only,  $n = 10$ ) to see if previously BE associated SNPs and/or haplotypes were more prevalent in patients with EA and BE. If the associated SNP was not present on the genotyping platform, a proxy was selected using the LD proxy and LD pair Tool (<https://ldlink.nci.nih.gov>, accessed on 2021/10/15), with a cut-off level of



$D' > 0.9$  and  $R' > 0.6$ . We compared these genotypes to unaffected controls ( $n = 730$ ), sequenced on the same platform as our patients, with a chi-square test and calculated odds ratios (ORs). Admixture was used to infer ancestry [75]. We used the allele counts and published ORs of the associated SNPs to calculate a polygenic risk score (PGRS) using an additive model:  $PGRS = \sum \ln(OR \text{ risk allele}) * \text{allele count}$  [76]. If multiple studies published an OR for a SNP, the OR from the study with the largest sample size was included in the PGRS. In a second calculation, we used the ORs of the associated SNPs as calculated from our study population. A Kruskal-Wallis test and Mann-Whitney tests were used to compare the PGRS between the different groups. All statistical analyses were performed in SPSS V.25.0 (IBM, Chicago, Illinois, USA), with a significance level of  $p < 0.05$ .

#### SM4: RNA sequencing

First, strand cDNA libraries were made with the strand-specific NEBNext Ultra II Directional RNA Library Prep Kit protocol and polyA mRNA workflow (NEB #E7760S/L) on an Illumina NovaSeq6000 (Illumina, San Diego, USA). Quality control, read trimming, read alignment, transcript quantification and differential expression analysis were performed using CLC Genomics Workbench version 20 (Qiagen, Venlo, The Netherlands). Reads were aligned to the human reference genome (hg19) according to the following settings: mismatch cost 2, insertion/deletion cost 3, length fraction 0.8, similarity fraction 0.8, alignment to gene regions only. Paired reads were counted as one. Trimmed mean per million (TMM) values was used to normalize for sequencing depth across samples. For each gene, counts per million (CPM) and transcripts per million (TPM) were calculated. Read counts were normalized for transcript length and total number of mapped reads (RPKM). Principal component analysis (PCA) was performed to explore cluster separation and identify outlying samples [77]. Counts for each individual gene were transformed to a smaller set of orthogonal principal components, in which the first component specifies the direction with the largest variability in the data. Two-dimensional and three-dimensional plots are produced. For each gene, log CPM values and a Z-score were calculated using all samples. Our ethics committee does not allow sharing of individual patient or control genotype information in the public domain, including sequencing reads.

#### SM5: Acid exposure experiments

To study the effect of GER on RNA level, we simulated a reflux episode in an in vitro experiment (Figure 3 in the main manuscript). The pH level of the stomach normally varies between 1.0 and 3.5 [78]. We evaluated the survival of fibroblasts in medium with a pH level between pH 1.5 and 3.5. All experiments were performed in duplo. Survival rate differences were determined using a paired t-test or a one-way analysis of variance (ANOVA). Next, comparison of an exposure time of 30, 60 and 120 minutes in both patient and control cell lines using these pH levels did not show a significant difference (Figure S1 and Table S7). Since a reflux episode is usually several minutes, we continued with an exposure time of 30 minutes.

For the final experiment, we exposed human fibroblasts from three patients with EA and three healthy controls for 30 minutes to medium with a pH level of 3.5 or to normal medium (control). Human fibroblasts were cultured in DMEM (Dulbecco's Modified Eagle's Medium; Invitrogen, Carlsbad, CA, USA), supplemented with 10% fetal calf serum (FCS) and 1% penicillin/streptomycin at 37 °C under a humidified 5% CO<sub>2</sub> atmosphere. Hydrochloric acid was added to culture medium until the desired pH level was reached. We selected an exposure time of 30 minutes to pH 3.5 adjusted medium. Subsequently, cells were washed with phosphate buffered saline (PBS) and given standard medium. After 24 hours, survival was measured with the TC20™ Automated Cell Counter (Bio-Rad Laboratories B.V., Veenendaal, The Netherlands). Cell morphology was evaluated with the Olympus IX70-S8F Inverted Fluorescence Microscope (Olympus Corporation, Tokyo, Japan).

## References

55. Palles, C.; Chegwidden, L.; Li, X.; Findlay, J.M.; Farnham, G.; Castro Giner, F.; Peppelenbosch, M.P.; Kovac, M.; Adams, C.L.; Prenen, H., et al. Polymorphisms near *tbx5* and *gdf7* are associated with increased risk for barrett's esophagus. *Gastroenterology* **2015**, *148*, 367–378.
56. Levine, D.M.; Ek, W.E.; Zhang, R.; Liu, X.; Onstad, L.; Sather, C.; Lao-Sirieix, P.; Gammon, M.D.; Corley, D.A.; Shaheen, N.J., et al. A genome-wide association study identifies new susceptibility loci for esophageal adenocarcinoma and barrett's esophagus. *Nat Genet* **2013**, *45*, 1487–1493.
57. Casson, A.G.; Zheng, Z.; Evans, S.C.; Geldenhuys, L.; van Zanten, S.V.; Veugelers, P.J.; Porter, G.A.; Guernsey, D.L. Cyclin d1 polymorphism (g870a) and risk for esophageal adenocarcinoma. *Cancer* **2005**, *104*, 730–739.
58. Ren, D.; Zheng, G.; Bream, S.; Tevebaugh, W.; Shaheen, N.J.; Chen, X. Single nucleotide polymorphisms of caudal type homeobox 1 and 2 are associated with barrett's esophagus. *Dig Dis Sci* **2014**, *59*, 57–63.
59. Su, Z.; Gay, L.J.; Strange, A.; Palles, C.; Band, G.; Whiteman, D.C.; Lescai, F.; Langford, C.; Nanji, M.; Edkins, S., et al. Common variants at the *mhc* locus and at chromosome 16q24.1 predispose to barrett's esophagus. *Nat Genet* **2012**, *44*, 1131–1136.
60. Becker, J.; May, A.; Gerges, C.; Anders, M.; Veits, L.; Weise, K.; Czamara, D.; Lyros, O.; Manner, H.; Terheggen, G., et al. Supportive evidence for *foxp1*, *barx1*, and *foxf1* as genetic risk loci for the development of esophageal adenocarcinoma. *Cancer Med* **2015**, *4*, 1700–1704.
61. Kala, Z.; Dolina, J.; Marek, F.; Izakovicova Holla, L. Polymorphisms of glutathione s-transferase *m1*, *t1* and *p1* in patients with reflux esophagitis and barrett's esophagus. *Journal of human genetics* **2007**, *52*, 527–534.
62. Bull, L.M.; White, D.L.; Bray, M.; Nurgalieva, Z.; El-Serag, H.B. Phase i and ii enzyme polymorphisms as risk factors for barrett's esophagus and esophageal adenocarcinoma: A systematic review and meta-analysis. *Dis Esophagus* **2009**, *22*, 571–587.
63. McElholm, A.R.; McKnight, A.J.; Patterson, C.C.; Johnston, B.T.; Hardie, L.J.; Murray, L.J.; Finbar, G. A population-based study of *igf* axis polymorphisms and the esophageal inflammation, metaplasia, adenocarcinoma sequence. *Gastroenterology* **2010**, *139*, 204–212 e203.
64. Moons, L.M.; Kusters, J.G.; van Delft, J.H.; Kuipers, E.J.; Gottschalk, R.; Geldof, H.; Bode, W.A.; Stoof, J.; van Vliet, A.H.; Ketelslegers, H.B., et al. A pro-inflammatory genotype predisposes to barrett's esophagus. *Carcinogenesis* **2008**, *29*, 926–931.
65. Buas, M.F.; He, Q.; Johnson, L.G.; Onstad, L.; Levine, D.M.; Thrift, A.P.; Gharahkhani, P.; Palles, C.; Lagergren, J.; Fitzgerald, R.C., et al. Germline variation in inflammation-related pathways and risk of barrett's oesophagus and oesophageal adenocarcinoma. *Gut* **2017**, *66*, 1739–1747.
66. Yan, C.; Ji, Y.; Huang, T.; Yu, F.; Gao, Y.; Gu, Y.; Qi, Q.; Du, J.; Dai, J.; Ma, H., et al. An esophageal adenocarcinoma susceptibility locus at 9q22 also confers risk to esophageal squamous cell carcinoma by regulating the function of *barx1*. *Cancer Lett* **2018**, *421*, 103–111.
67. Abnet, C.C.; Freedman, N.D.; Hu, N.; Wang, Z.; Yu, K.; Shu, X.O.; Yuan, J.M.; Zheng, W.; Dawsey, S.M.; Dong, L.M., et al. A shared susceptibility locus in *plce1* at 10q23 for gastric adenocarcinoma and esophageal squamous cell carcinoma. *Nat Genet* **2010**, *42*, 764–767.
68. Dura, P.; van Veen, E.M.; Salomon, J.; te Morsche, R.H.; Roelofs, H.M.; Kristinsson, J.O.; Wobbes, T.; Witteman, B.J.; Tan, A.C.; Drenth, J.P., et al. Barrett associated *mhc* and *foxf1* variants also increase esophageal carcinoma risk. *Int J Cancer* **2013**, *133*, 1751–1755.

- 
69. Wideroff, L.; Vaughan, T.L.; Farin, F.M.; Gammon, M.D.; Risch, H.; Stanford, J.L.; Chow, W.H. Gst, nat1, cyp1a1 polymorphisms and risk of esophageal and gastric adenocarcinomas. *Cancer Detect Prev* **2007**, *31*, 233–236.
  70. Gross, R.E. *The Surgery of Infancy and Childhood: Its Principles and Techniques*; W.B. Saunders Co.: Philadelphia, PA, USA, 1953.
  71. Lundell, L.R.; Dent, J.; Bennett, J.R.; Blum, A.L.; Armstrong, D.; Galmiche, J.P.; Johnson, F.; Hongo, M.; Richter, J.E.; Spechler, S.J., et al. Endoscopic assessment of oesophagitis: Clinical and functional correlates and further validation of the los angeles classification. *Gut* **1999**, *45*, 172–180.
  72. Rasanen, K.; Itkonen, O.; Koistinen, H.; Stenman, U.H. Emerging roles of spink1 in cancer. *Clin Chem* **2016**, *62*, 449–457.
  73. Jennings, R.E.; Berry, A.A.; Kirkwood-Wilson, R.; Roberts, N.A.; Hearn, T.; Salisbury, R.J.; Blaylock, J.; Piper Hanley, K.; Hanley, N.A. Development of the human pancreas from foregut to endocrine commitment. *Diabetes* **2013**, *62*, 3514–3522.
  74. Gene expression for spink1 (ensg00000164266.10). Available online: <https://gtexportal.org/home/gene/SPINK1> (accessed on 2021/10/15)
  75. Alexander, D.H.; Lange, K. Enhancements to the admixture algorithm for individual ancestry estimation. *BMC Bioinformatics* **2011**, *12*, 246.
  76. Wray, N.R.; Goddard, M.E.; Visscher, P.M. Prediction of individual genetic risk to disease from genome-wide association studies. *Genome Res* **2007**, *17*, 1520–1528.
  77. Clc genomics workbench user manual. Available online: <https://digitalinsights.qiagen.com/technical-support/manuals/> (accessed on 2021/10/15)
  78. Bus, P.; Siersema, P.D.; Verbeek, R.E.; van Baal, J.W. Upregulation of mirna-143, -145, -192, and -194 in esophageal epithelial cells upon acidic bile salt stimulation. *Dis Esophagus* **2014**, *27*, 591–600.
